# Supplementary material for: Bora-amidinate as a cooperative ligand in group 2 metal catalysis
Source: Royal Society of Chemistry journal article supplement (doi:10.1039/c7dt02136d), 2017-01-01
Supplement: c7dt02136d1.pdf [file c7dt02136d1.pdf]

# SUPPORTING INFORMATION

## Bora-amidinate as a cooperative ligand in group 2 metal catalysis

Benjamin Freitag,<sup>a</sup> Christian A. Fischer,<sup>a</sup> Johanne Penafiel,<sup>a</sup> Gerd Ballmann,<sup>a</sup> Holger Elsen,<sup>a</sup> Christian Färber,<sup>a</sup> Dirk F. Piesik<sup>b</sup> and Sjoerd Harder\*<sup>a</sup>

<sup>a</sup>*Inorganic and Organometallic Chemistry, Friedrich-Alexander-Universität Erlangen-Nürnberg, Egerlandstraße 1, 91058 Erlangen, Germany.*

<sup>b</sup>*Inorganic Chemistry, Universität Duisburg-Essen, Universitätsstrasse 7, 45151 Essen, Germany.*

| <b>Contents</b>                                                                                                                            | <b>Page</b> |
|--------------------------------------------------------------------------------------------------------------------------------------------|-------------|
| 1. Crystal structures                                                                                                                      | S2          |
| 2. Selected <sup>1</sup> H and <sup>13</sup> C NMR spectra                                                                                 | S7          |
| 3. Solution characterization of (DIPP)NBN-H)Mg-N(H)CH <sub>2</sub> CMe <sub>2</sub> CH <sub>2</sub> CH=CH <sub>2</sub> ·(THF) <sub>x</sub> | S14         |
| 4. Theoretical calculations                                                                                                                | S19         |
| 5. References                                                                                                                              | S36         |

## 1. Crystal structures

Crystal structures have been measured on a SuperNova (Agilent) diffractometer with dual Cu and Mo microfocus sources and an Atlas S2 detector ( $\text{DIPPNBN-Mg}\cdot\text{THF}_3$ ) and on Bruker SMART diffractometer with APEXII detector ( $\text{DIPPNBN-Ca}\cdot\text{THF}_4$ ). Using Olex2,<sup>1</sup> the structures were solved by Direct Methods (ShelXT)<sup>2</sup> and refined with ShelXL<sup>3</sup> using Least Squares minimization. Geometric calculations and graphical presentations were done with the program PLATON.<sup>4</sup> Crystallographic data can be found below and have been deposited with the Cambridge Crystallographic Data Centre as supplementary publication no. CCDC 1551537 ( $\text{DIPPNBN-Ca}\cdot\text{THF}_4$ ) and 1551538 ( $\text{DIPPNBN-Mg}\cdot\text{THF}_3$ ). Copies of the data can be obtained free of charge on application to CCDC, 12 Union Road, Cambridge CB21EZ, UK (fax: (+44)1223-336-033; E-mail: [deposit@ccdc.cam.ac.uk](mailto:deposit@ccdc.cam.ac.uk)).

## 1.1 Crystal structure of <sup>DIPP</sup>NBN-Mg·THF<sub>3</sub>

All H atoms have been placed at idealized positions and were refined isotropically in a riding mode, except for the H atom attached to B. The latter was located in a difference Fourier map and refined isotropically. The correct chirality of the structure solution was confirmed by refinement of the Flack parameter to -0.04(3).

**Table S1.** Crystal data and structure refinement for <sup>DIPP</sup>NBN-Mg·THF<sub>3</sub>.

|                                             |                                                                  |
|---------------------------------------------|------------------------------------------------------------------|
| Identification code                         | hasj161205b                                                      |
| Empirical formula                           | C <sub>36</sub> H <sub>59</sub> BMgN <sub>2</sub> O <sub>3</sub> |
| Formula weight                              | 602.97                                                           |
| Temperature/K                               | 100                                                              |
| Crystal system                              | orthorhombic                                                     |
| Space group                                 | P2 <sub>1</sub> 2 <sub>1</sub> 2 <sub>1</sub>                    |
| a/Å                                         | 10.5266(2)                                                       |
| b/Å                                         | 17.9167(3)                                                       |
| c/Å                                         | 18.7856(4)                                                       |
| α/°                                         | 90                                                               |
| β/°                                         | 90                                                               |
| γ/°                                         | 90                                                               |
| Volume/Å <sup>3</sup>                       | 3543.00(12)                                                      |
| Z                                           | 4                                                                |
| ρ <sub>calc</sub> /cm <sup>3</sup>          | 1.130                                                            |
| μ/mm <sup>-1</sup>                          | 0.698                                                            |
| F(000)                                      | 1320.0                                                           |
| Crystal size/mm <sup>3</sup>                | 0.425 × 0.28 × 0.164                                             |
| Radiation                                   | CuKα (λ = 1.54184)                                               |
| 2θ range for data collection/°              | 6.818 to 136.23                                                  |
| Index ranges                                | -12 ≤ h ≤ 12, -21 ≤ k ≤ 21, -22 ≤ l ≤ 21                         |
| Reflections collected                       | 17026                                                            |
| Independent reflections                     | 6422 [R <sub>int</sub> = 0.0486, R <sub>sigma</sub> = 0.0457]    |
| Data/restraints/parameters                  | 6422/0/400                                                       |
| Goodness-of-fit on F <sup>2</sup>           | 1.021                                                            |
| Final R indexes [I ≥ 2σ (I)]                | R <sub>1</sub> = 0.0466, wR <sub>2</sub> = 0.1218                |
| Final R indexes [all data]                  | R <sub>1</sub> = 0.0490, wR <sub>2</sub> = 0.1245                |
| Largest diff. peak/hole / e Å <sup>-3</sup> | 0.42/-0.31                                                       |
| Flack parameter                             | -0.04(3)                                                         |

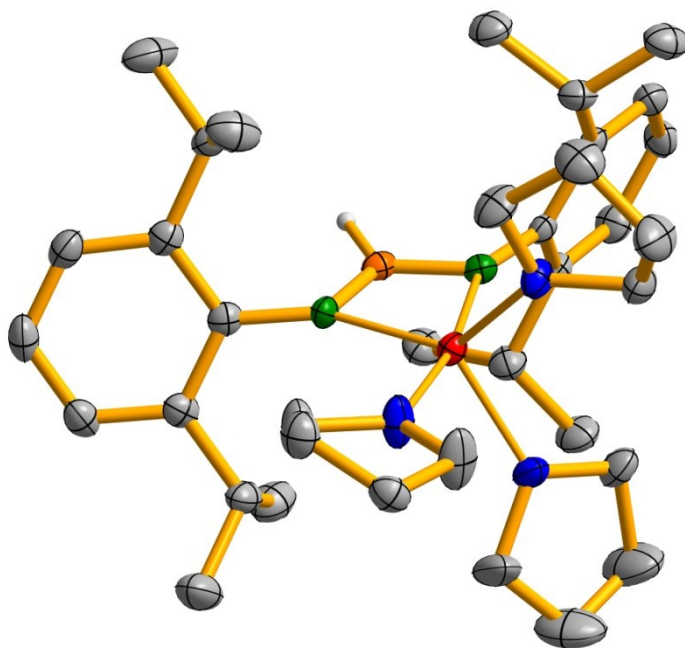

**Figure S1.** ORTEP plot for  $\text{DIPP-NBN-Mg}\cdot\text{THF}_3$ ; 50% probability.

## 1.2 Crystal structure of $\text{DIPP-NBN-Ca}\cdot\text{THF}_4$

Only smaller weakly diffracting crystals could be obtained. All H atoms have been placed at idealized positions and were refined isotropically in a riding mode, except for the H atom attached to B. The latter was located in a difference Fourier map and refined isotropically. Slight disorder in the THF ligands was treated by refinement with high anisotropy. The correct chirality of the structure solution was confirmed by refinement of the Flack parameter to -0.01(5).

**Table S2.** Crystal data and structure refinement for <sup>DIPP</sup>NBN-Ca-THF<sub>4</sub>.

|                                             |                                                                  |
|---------------------------------------------|------------------------------------------------------------------|
| Identification code                         | hasj180                                                          |
| Empirical formula                           | C <sub>40</sub> H <sub>67</sub> BCaN <sub>2</sub> O <sub>4</sub> |
| Formula weight                              | 690.85                                                           |
| Temperature/K                               | 173                                                              |
| Crystal system                              | triclinic                                                        |
| Space group                                 | P1                                                               |
| a/Å                                         | 10.1263(10)                                                      |
| b/Å                                         | 10.1718(9)                                                       |
| c/Å                                         | 11.2367(6)                                                       |
| α/°                                         | 81.148(6)                                                        |
| β/°                                         | 66.376(6)                                                        |
| γ/°                                         | 74.572(6)                                                        |
| Volume/Å <sup>3</sup>                       | 1020.74(17)                                                      |
| Z                                           | 1                                                                |
| ρ <sub>calc</sub> /cm <sup>3</sup>          | 1.124                                                            |
| μ/mm <sup>-1</sup>                          | 0.193                                                            |
| F(000)                                      | 378                                                              |
| Crystal size/mm <sup>3</sup>                | 0.10 × 0.10 × 0.10                                               |
| Radiation                                   | MoKα (λ = 0.71073)                                               |
| 2θ range for data collection/°              | 2.0 to 24.8                                                      |
| Index ranges                                | -11 ≤ h ≤ 11, -11 ≤ k ≤ 11, -13 ≤ l ≤ 13                         |
| Reflections collected                       | 17051                                                            |
| Independent reflections                     | 6562 [R <sub>int</sub> = 0.073, R <sub>sigma</sub> = 0.0963]     |
| Data/restraints/parameters                  | 6562/0/446                                                       |
| Goodness-of-fit on F <sup>2</sup>           | 1.12                                                             |
| Final R indexes [I ≥ 2σ (I)]                | R <sub>1</sub> = 0.0765, wR <sub>2</sub> = 0.1811                |
| Final R indexes [all data]                  | R <sub>1</sub> = 0.0984, wR <sub>2</sub> = 0.1959                |
| Largest diff. peak/hole / e Å <sup>-3</sup> | 0.77/-0.29                                                       |
| Flack parameter                             | -0.01(5)                                                         |

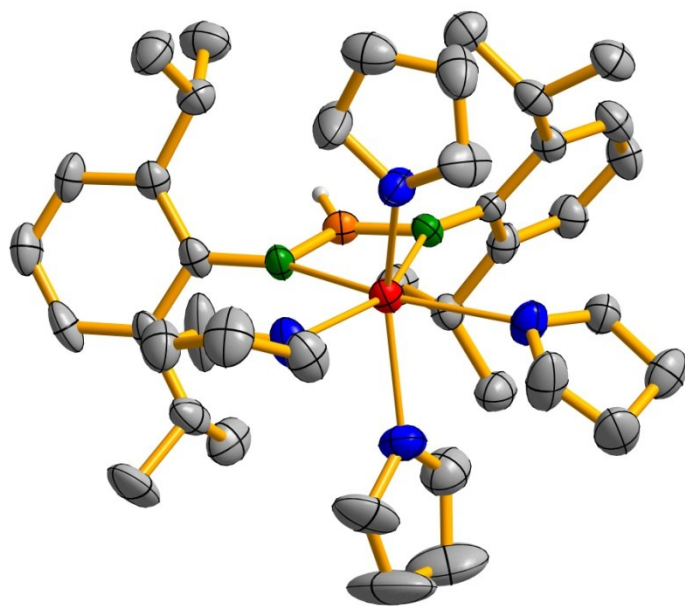

**Figure S2.** ORTEP plot for  $\text{DIPP-NBN-Ca-THF}_4$ ; 50% probability.

## 2. Selected $^1\text{H}$ and $^{13}\text{C}$ NMR spectra

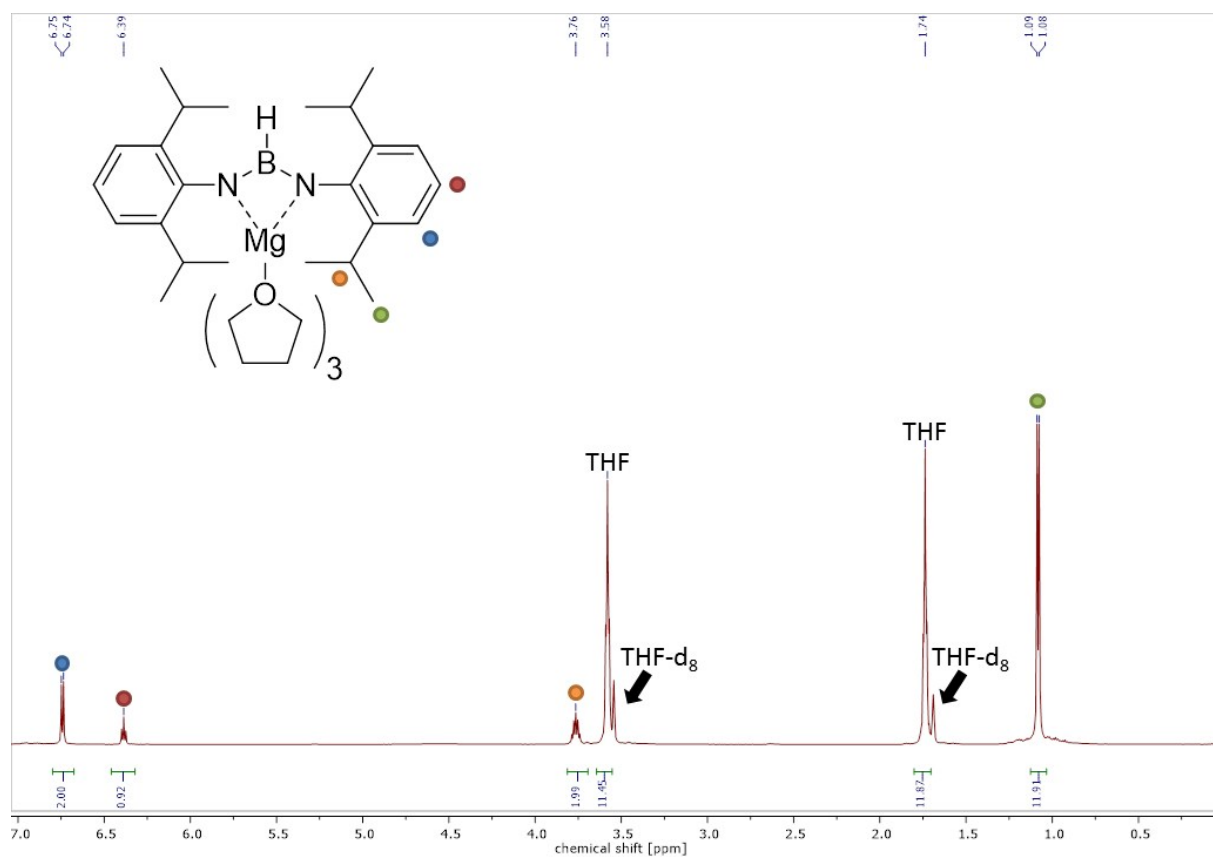

**Figure S3.**  $^1\text{H}$  NMR spectrum of  $\text{DIPPNBN-Mg}\cdot(\text{THF})_3$  in  $\text{THF-d}_8$  (298K, 600 MHz).

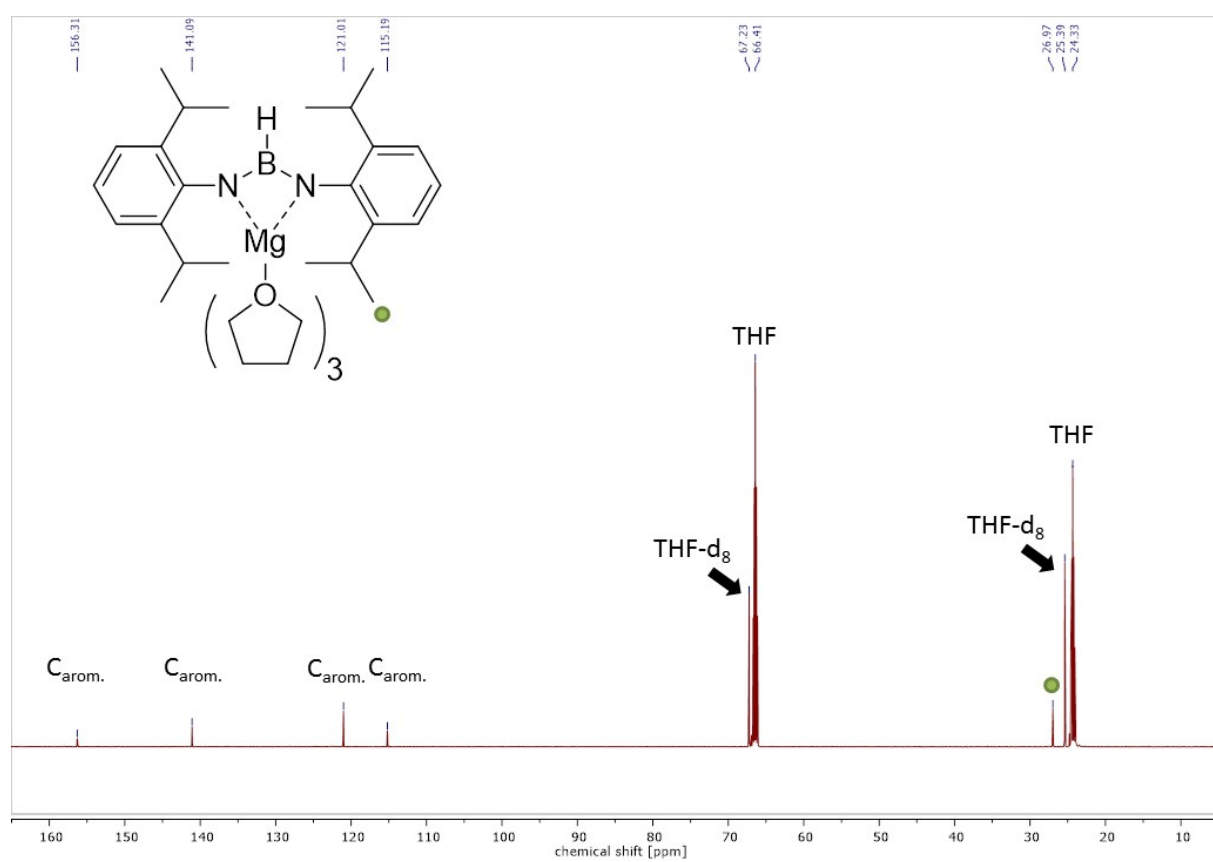

**Figure S4.**  $^{13}\text{C}$  NMR spectrum of  $\text{DIPPNBN-Mg}\cdot(\text{THF})_3$  in  $\text{THF-d}_8$  (298K, 151 MHz).

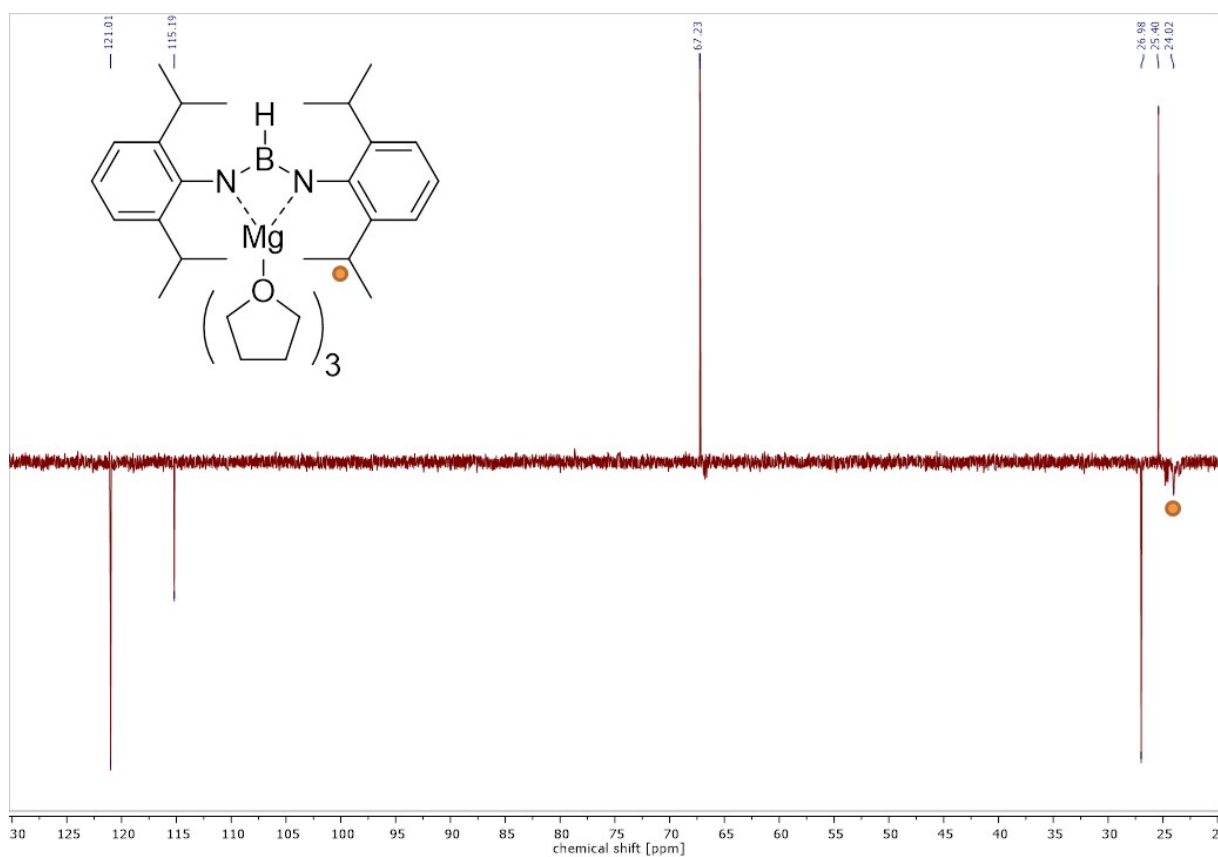

**Figure S5.** DEPT-135 spectrum of  $\text{DIPP-NBN-Mg}\cdot(\text{THF})_3$  in  $\text{THF-d}_8$  (298K, 151 MHz) allows for detection of the iPr CH signal.

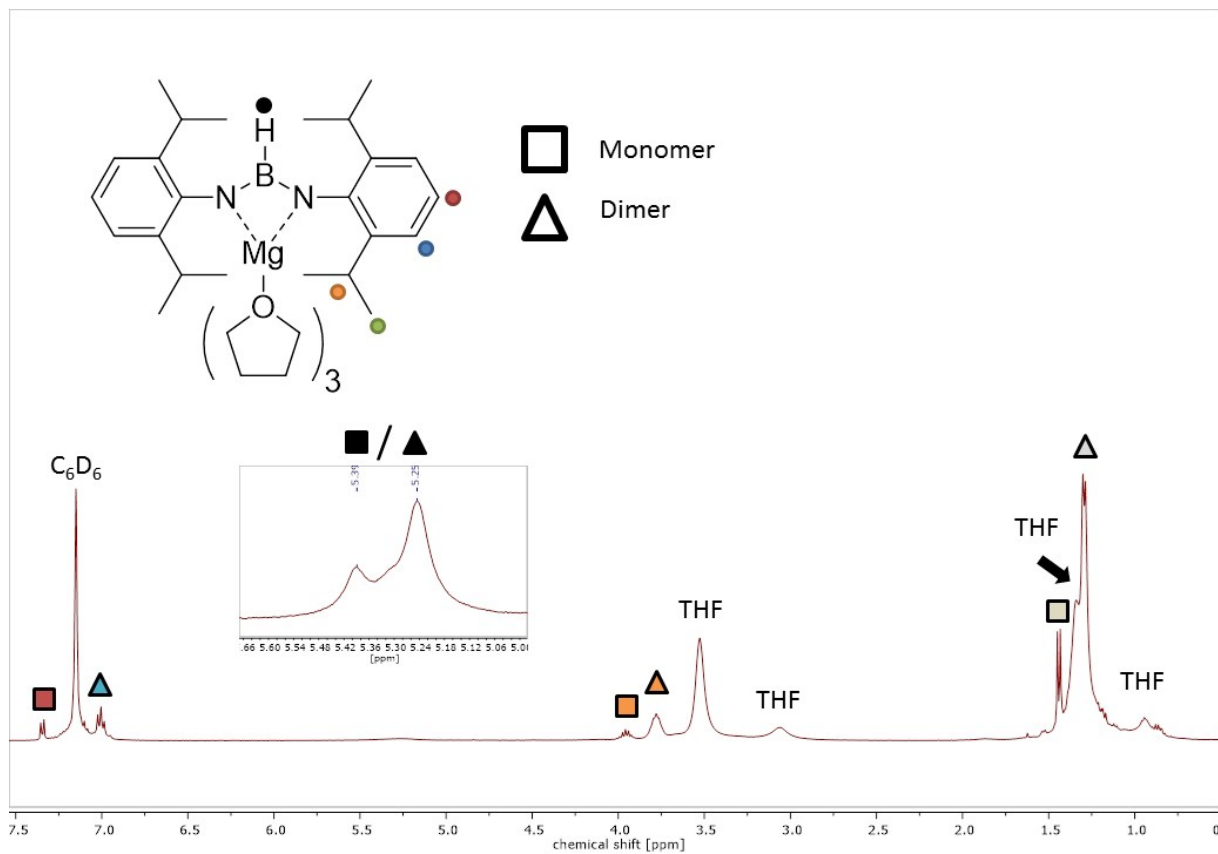

**Figure S6.**  $^1\text{H}$  NMR spectrum of  $\text{DIPP-NBN-Mg}\cdot(\text{THF})_3$  in  $\text{C}_6\text{D}_6$  (298K, 400 MHz)



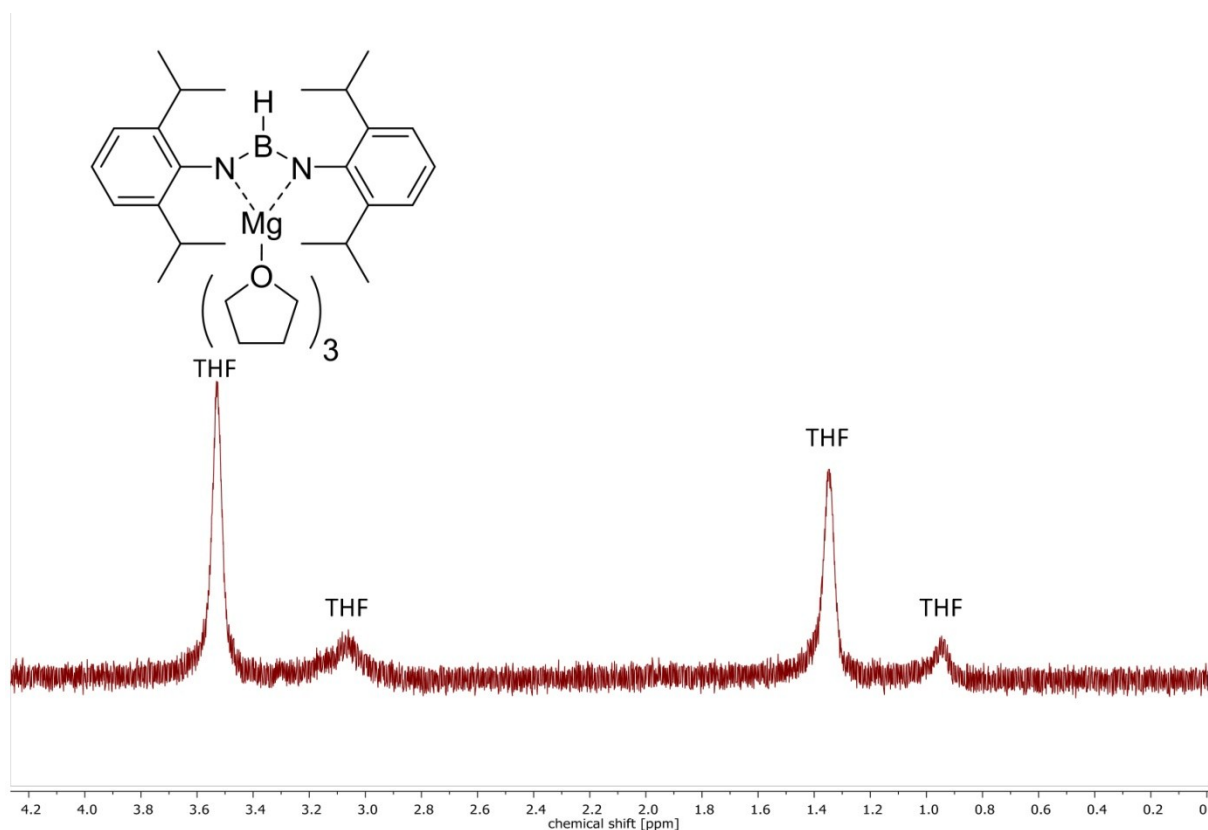

**Figure S7.**  $^1\text{H}$  TOCSY NMR spectrum of  $\text{DIPP-NBN-Mg}(\text{THF})_3$  in  $\text{C}_6\text{D}_6$  (298K, 100 MHz) with irradiation at the frequency for the smaller signal at 3.06 ppm showing exchange of THF bound to monomer (larger signal) and THF bound to dimer (smaller signal).

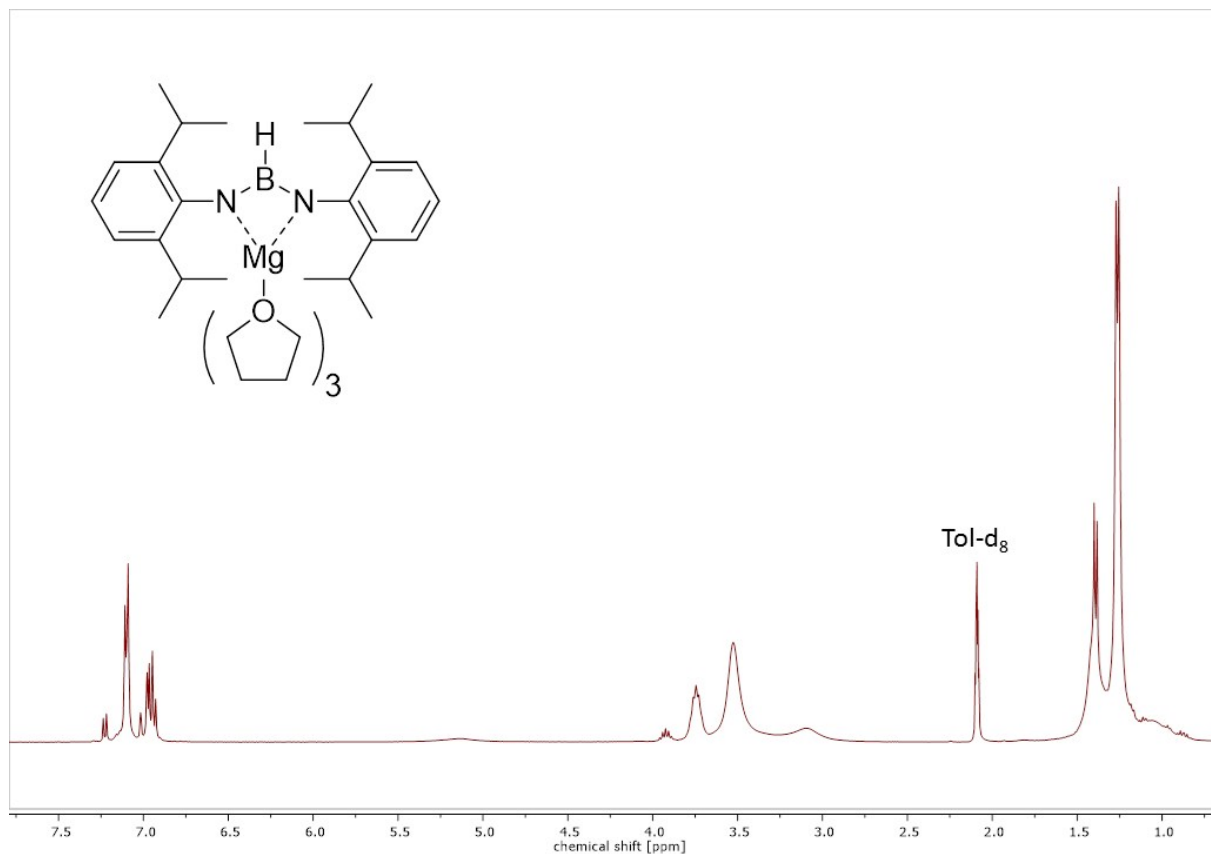

**Figure S8.**  $^1\text{H}$  NMR spectrum of  $\text{DIPP-NBN-Mg}(\text{THF})_3$  in Tol- $\text{d}_8$  (298K, 400 MHz).

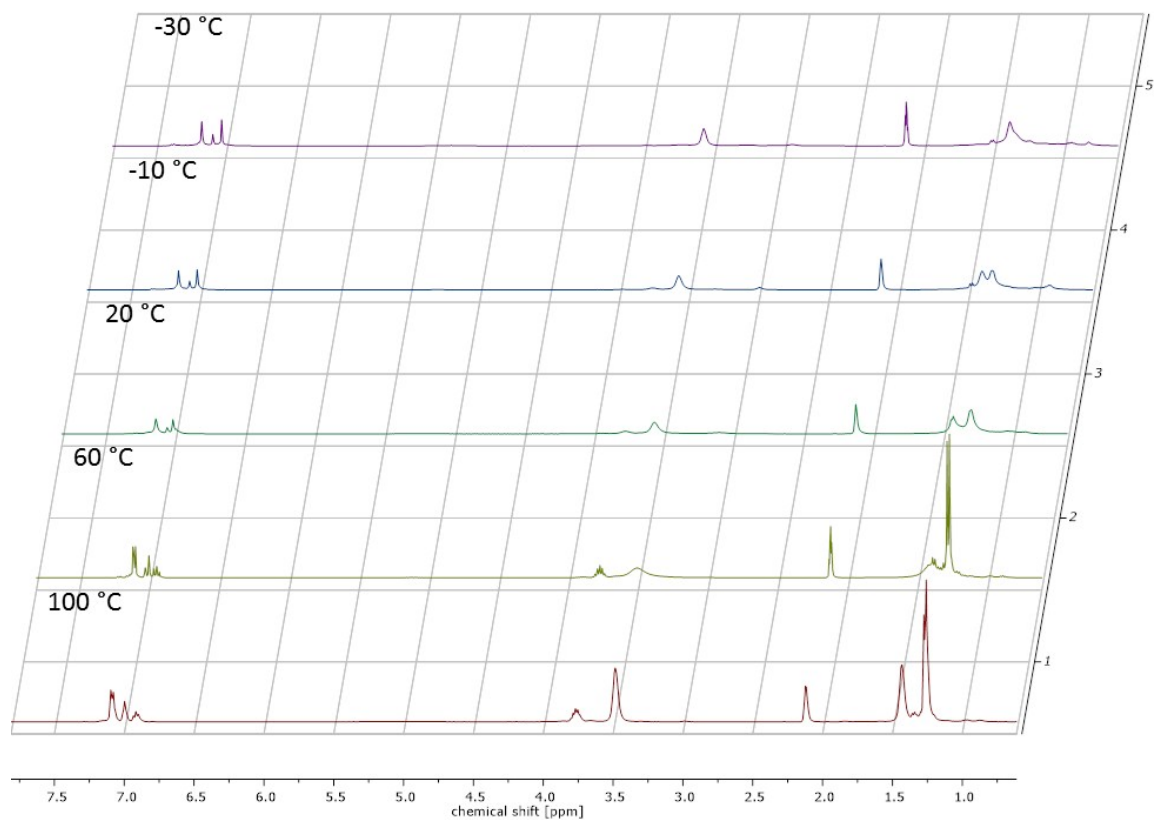

**Figure S9.**  $^1\text{H}$  NMR spectrum of  $\text{D}^{1\text{PP}}\text{NBN-Mg}\cdot(\text{THF})_3$  in  $\text{Tol-d}_8$  (298K, 400 MHz) at  $-30^\circ\text{C}$ ,  $-10^\circ\text{C}$ ,  $20^\circ\text{C}$ ,  $60^\circ\text{C}$  and  $100^\circ\text{C}$ .

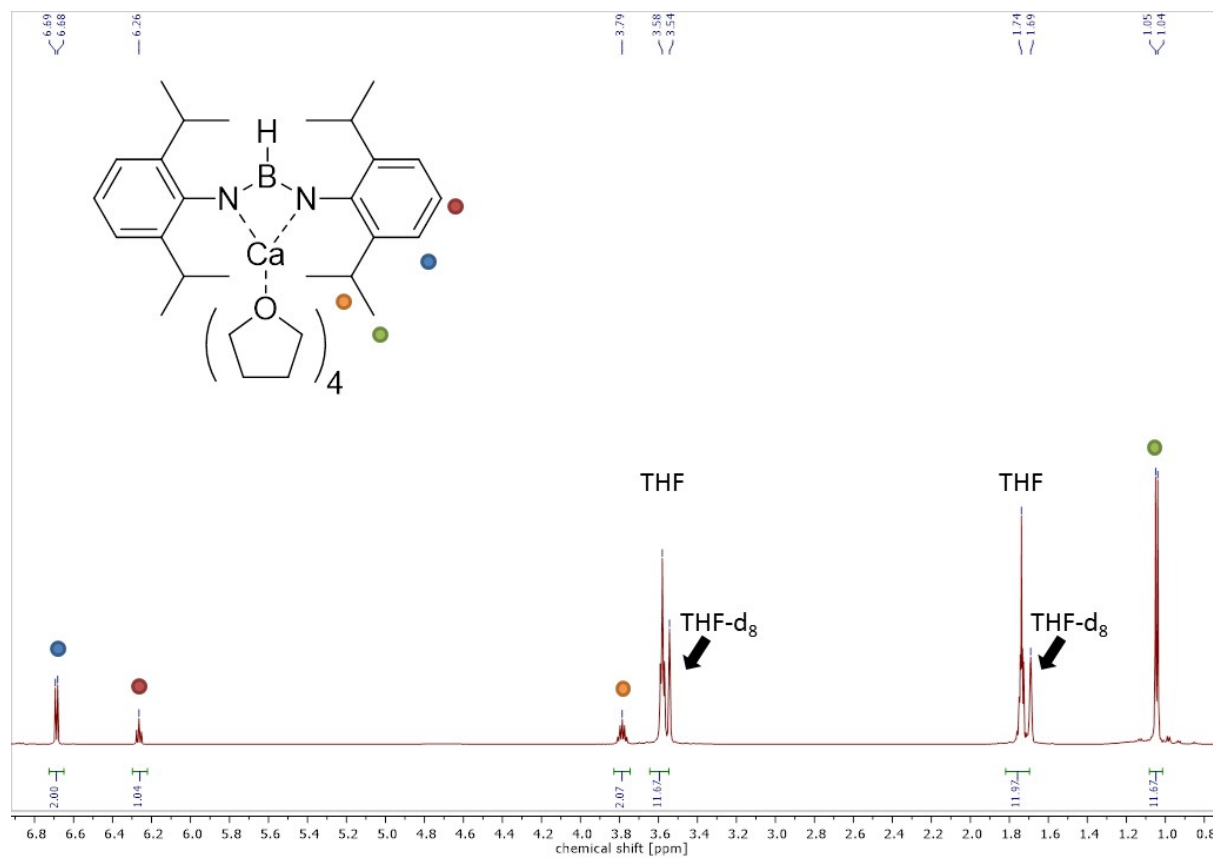

**Figure S10.**  $^1\text{H}$  NMR spectrum of  $\text{D}^{1\text{PP}}\text{NBN-Ca}\cdot(\text{THF})_4$  in  $\text{THF-d}_8$  (298K, 600 MHz).

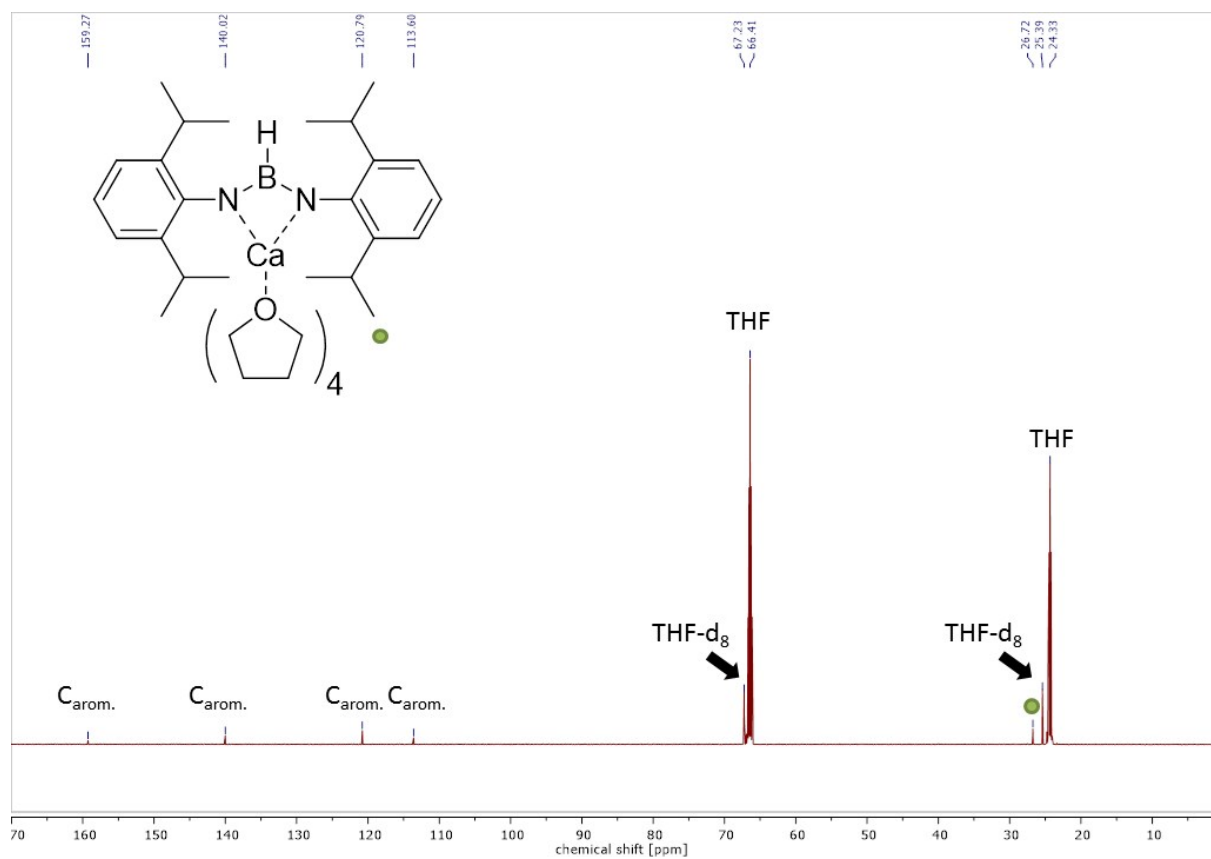

Figure S11.  $^{13}\text{C}$  NMR spectrum of  $\text{DIPP-NBN-Ca}\cdot(\text{THF})_4$  in  $\text{THF-d}_8$  (298K, 151 MHz).

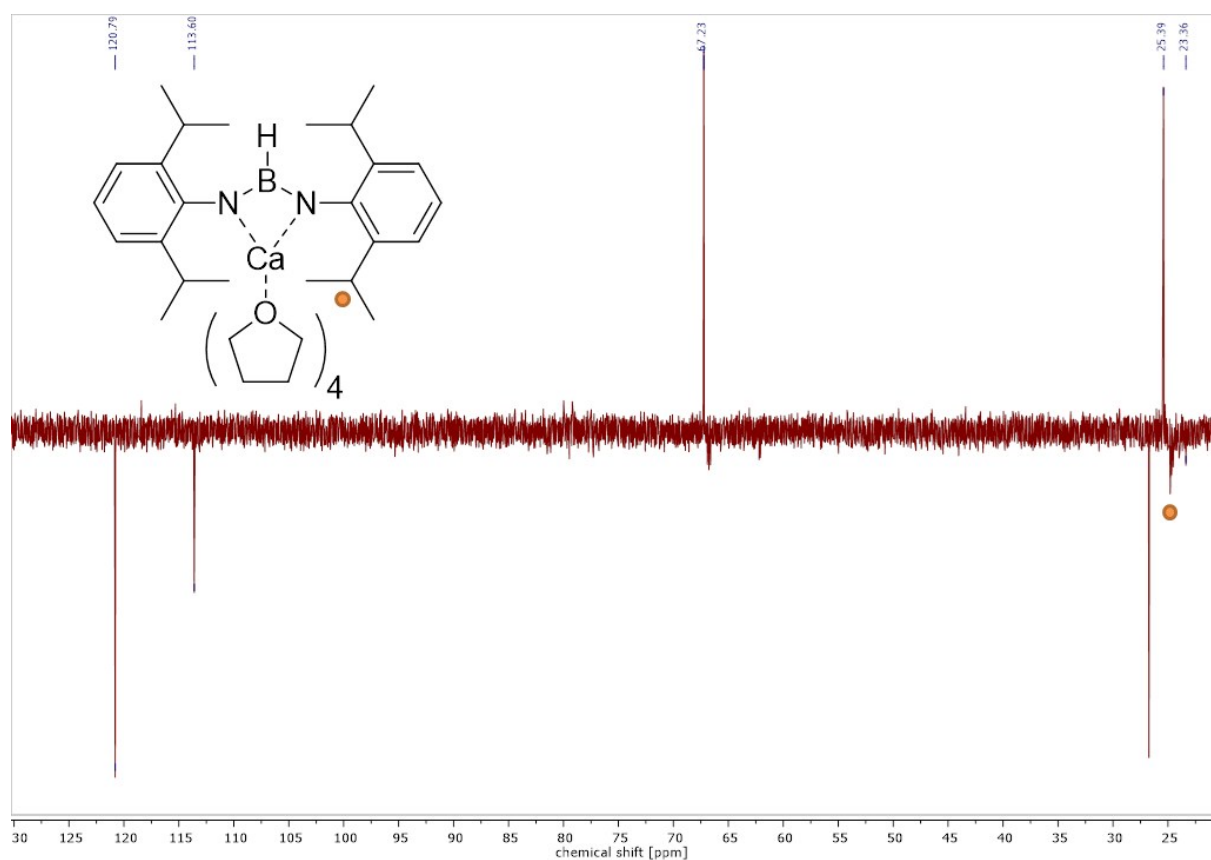

Figure S12. DEPT-135 spectrum of  $\text{DIPP-NBN-Ca}\cdot(\text{THF})_4$  in  $\text{THF-d}_8$  (298K, 151 MHz) allows for detection of the  $\text{iPr}$  CH signal.

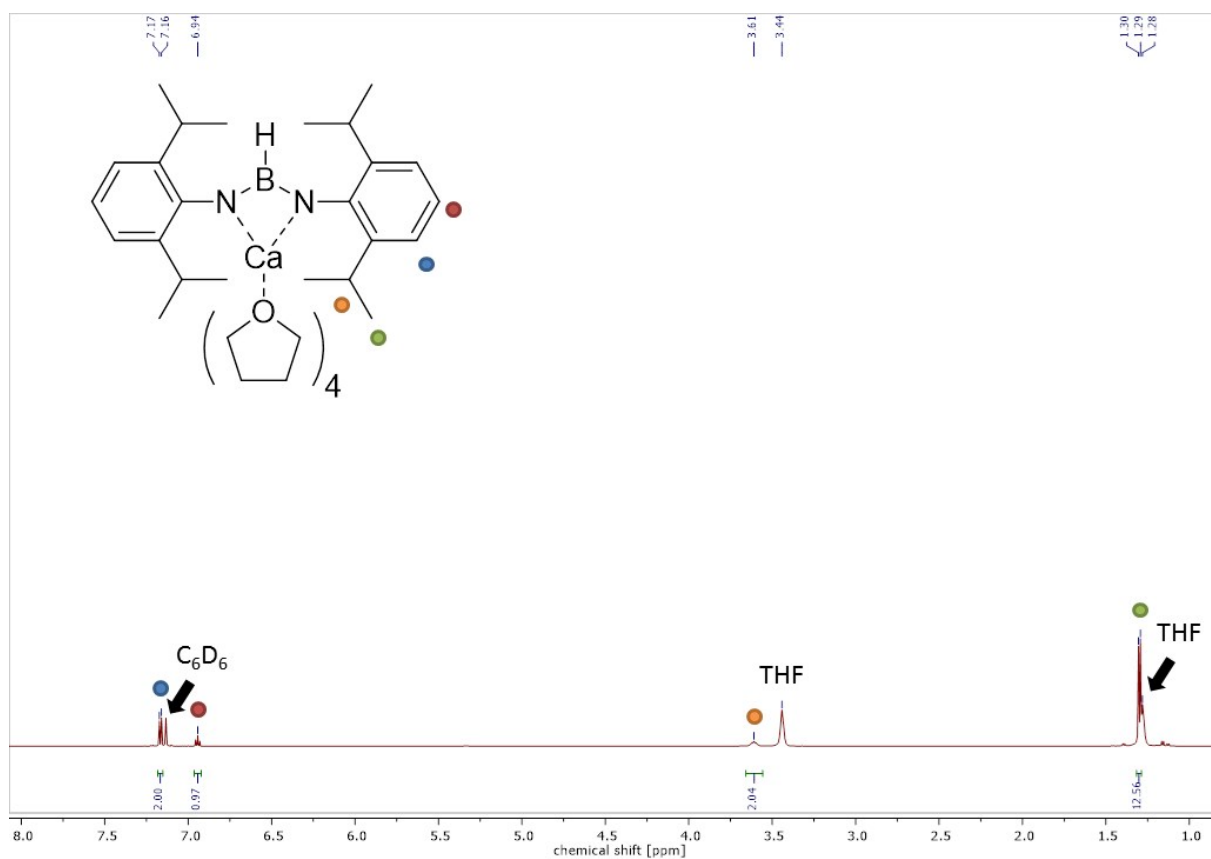

**Figure S13.**  $^1\text{H}$  NMR spectrum of  $\text{DIPP-NBN-Ca}\cdot(\text{THF})_4$  in  $\text{C}_6\text{D}_6$  (298K, 600 MHz).

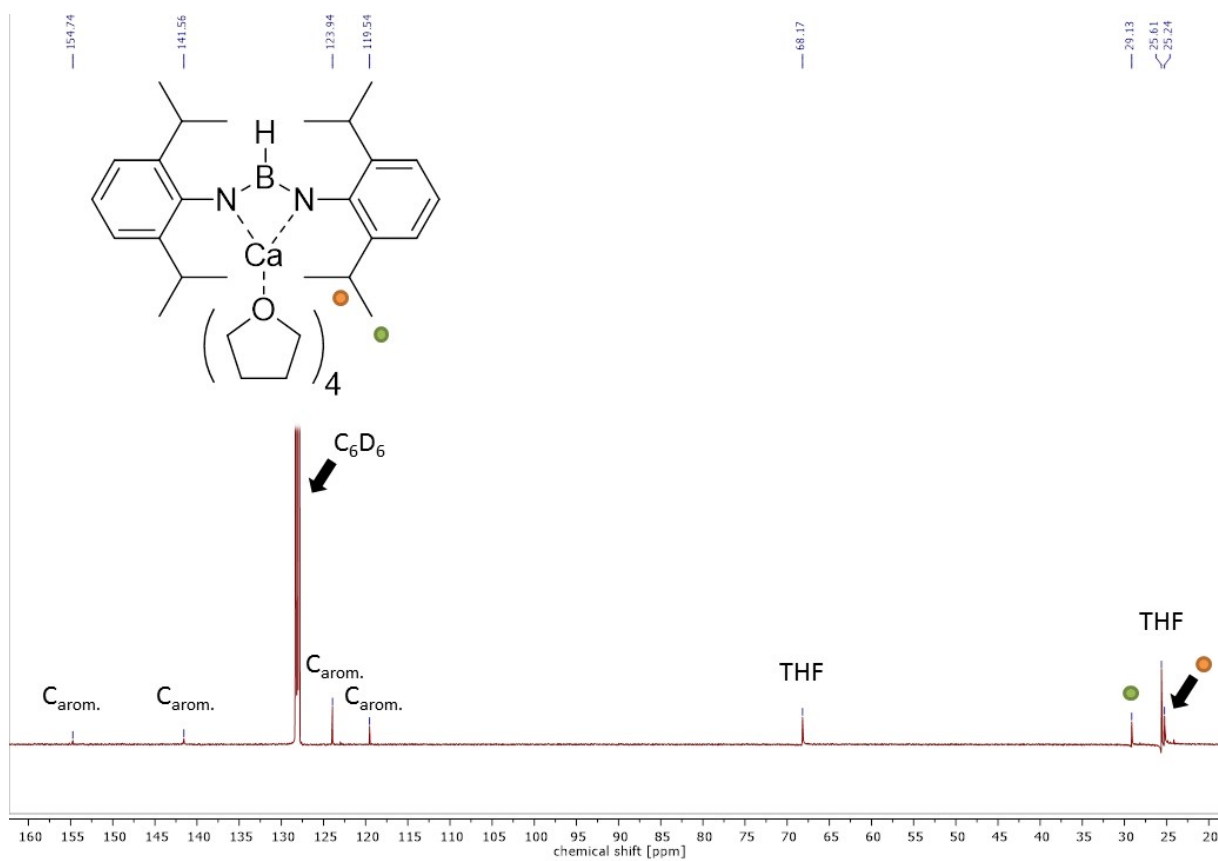

**Figure S14.**  $^{13}\text{C}$  NMR spectrum of  $\text{DIPP-NBN-Ca}\cdot(\text{THF})_4$  in  $\text{C}_6\text{D}_6$  (298K, 151 MHz).

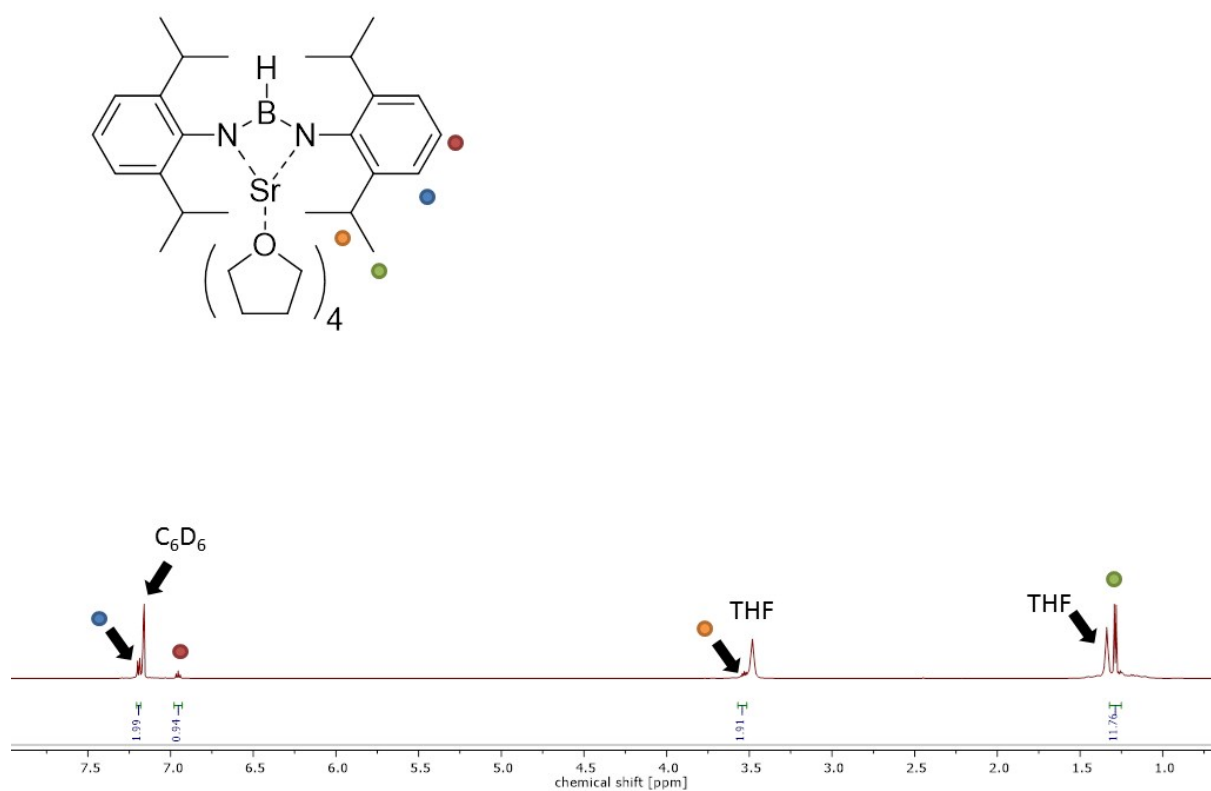

**Figure S15.**  $^1\text{H NMR}$  spectrum of  $\text{DIPP-NBN-Sr(THF)}_4$  in  $\text{C}_6\text{D}_6$  (298K, 600 MHz).

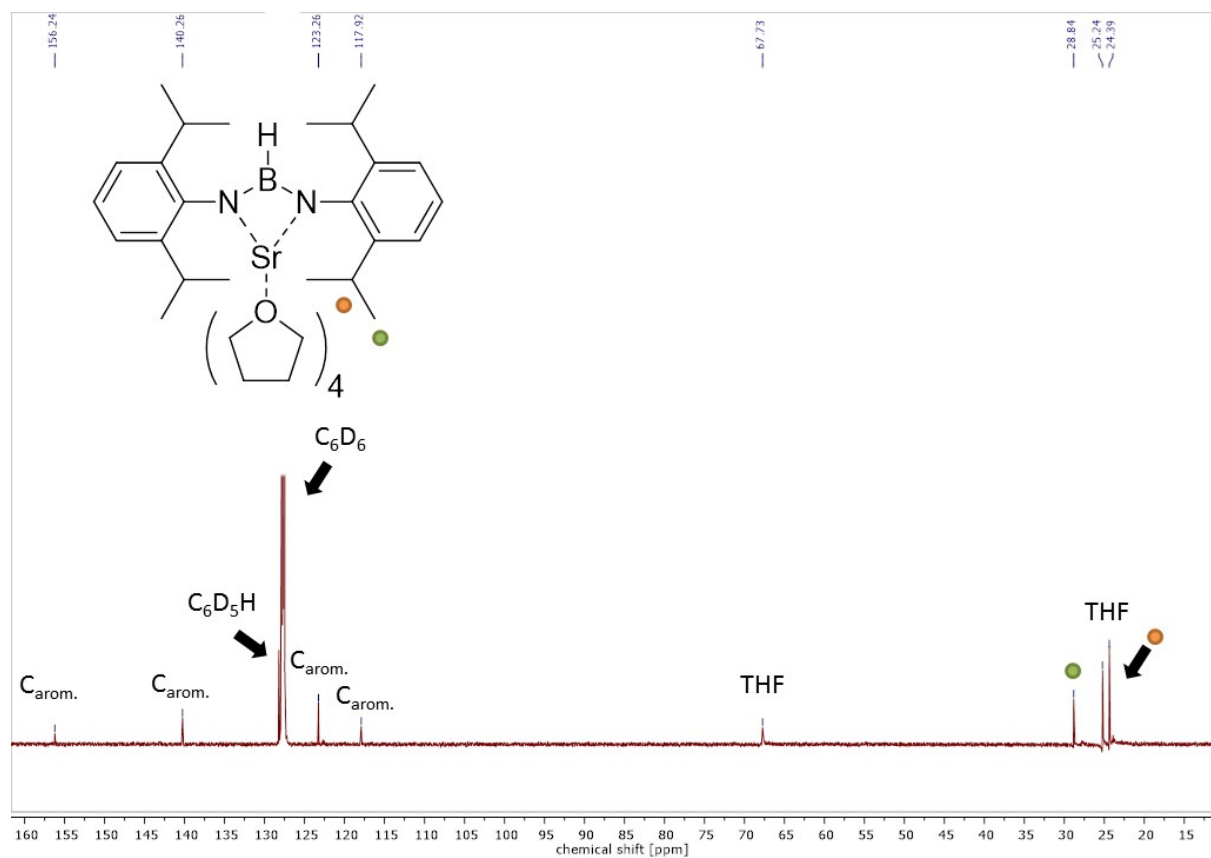

**Figure S16.**  $^{13}\text{C NMR}$  spectrum of  $\text{DIPP-NBN-Sr(THF)}_4$  in  $\text{C}_6\text{D}_6$  (298K, 151 MHz).

### 3. Solution characterization of $(^{DIPP}NBN-H)Mg-N(H)CH_2CMe_2CH_2CH=CH_2 \cdot (THF)_x$

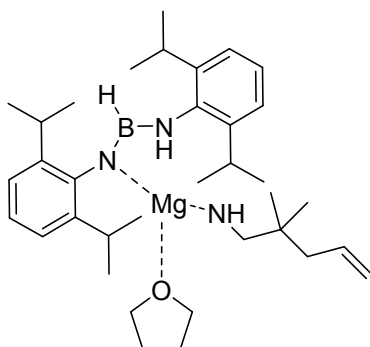

NMR scale experiment: In the glovebox, 2,2-dimethylpent-4-en-1-amine (7.2 mg, 0.0636 mmol) was dissolved in  $C_6D_6$  (550  $\mu$ l) and  $^{DIPP}NBN-Mg \cdot (THF)_3$  (38.2 mg, 0.0636 mmol) was added to the solution at room temperature. This immediately resulted in a clear solution. The formation of  $(^{DIPP}NBN-H)Mg-N(H)CH_2CMe_2CH_2CH=CH_2 \cdot (THF)_x$  could be directly observed via NMR measurements. No ring closure or decomposition could be observed even after heating to 100 °C for three days.

Evidence for the existence of the species  $(^{DIPP}NBN-H)Mg-N(H)CH_2CMe_2CH_2CH=CH_2 \cdot (THF)_x$  is based on the following observations:

(i) The  $^1H$  NMR spectrum shows a new set of signals for the substrate molecule (Figure S17); for comparison the  $^1H$  NMR spectrum of the substrate  $H_2NCH_2CMe_2CH_2CH=CH_2$  is also shown (Figure S23). The  $^1H$  NMR spectrum of  $(^{DIPP}NBN-H)Mg-N(H)CH_2CMe_2CH_2CH=CH_2 \cdot (THF)_x$  shows a high-field triplet which we assign to the negatively charged NH in the substrate (coupling with  $CH_2$ ).

(ii) The  $^{15}N$  HSQC (Figure S19) shows two different NH cross peaks and also enables assignment of the NBN NH signal.

(iii) The  $^{13}C$  HSQC (Figure S21) shows no correlation between the NH fragments and any carbon which confirms their assignment.

(iv) A DOSY spectrum (Figure S20) shows that all aromatic, aliphatic and NH signals belong to one species that therefore must contain  $^{DIPP}NBN$  and substrate fragments.

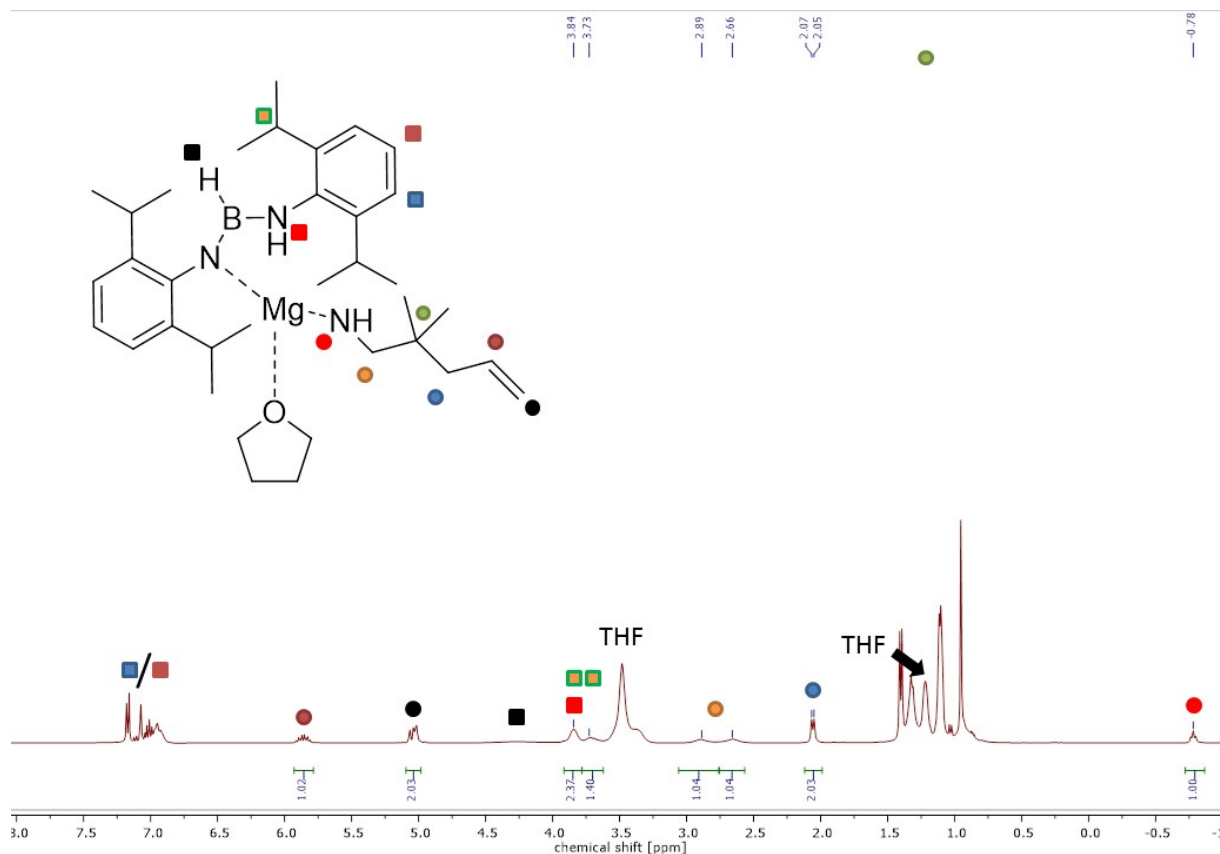

**Figure S17.**  $^1\text{H}$  NMR spectrum of  $(\text{DIPPNBN-H})\text{Mg-N(H)CH}_2\text{CMe}_2\text{CH}_2\text{CH=CH}_2\cdot(\text{THF})_x$  in  $\text{C}_6\text{D}_6$  (298K, 400 MHz).

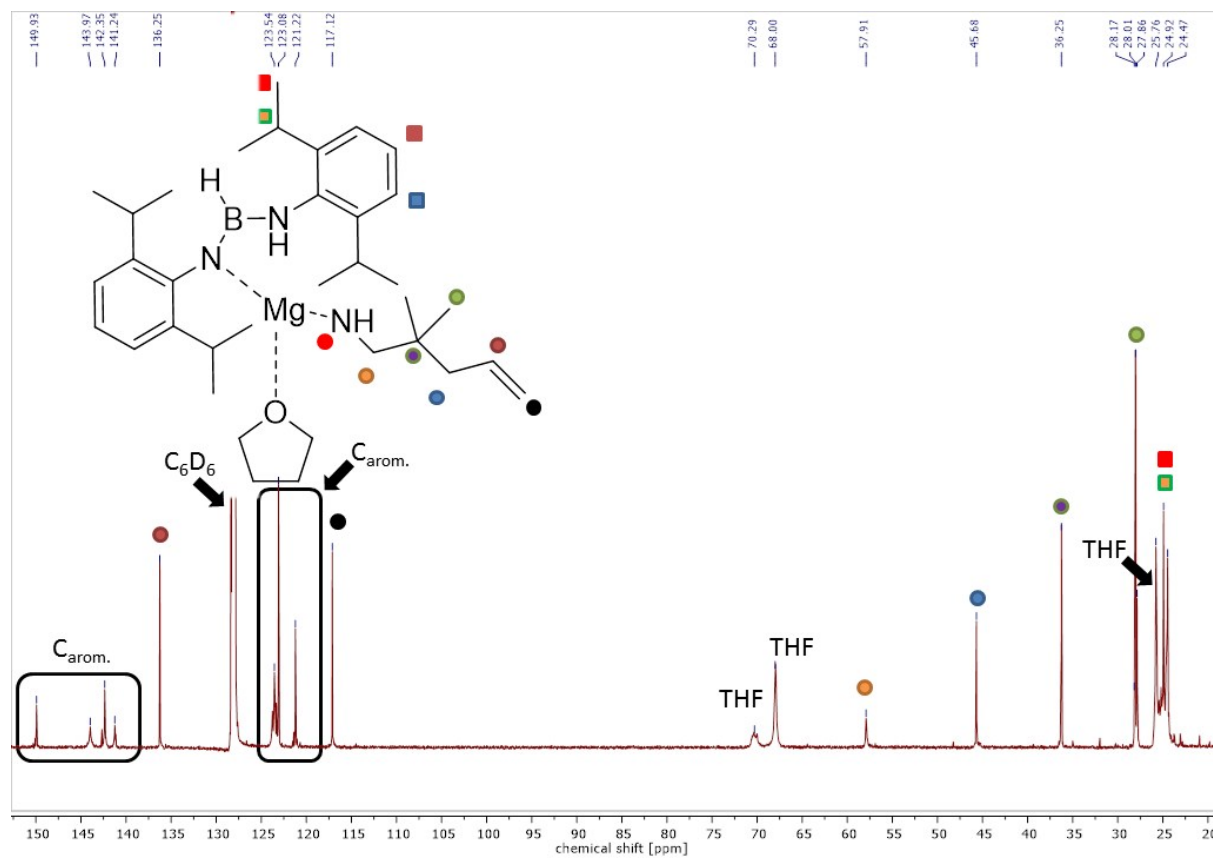

**Figure S18.**  $^{13}\text{C}$  NMR spectrum of  $(\text{DIPPNBN-H})\text{Mg-N(H)CH}_2\text{CMe}_2\text{CH}_2\text{CH=CH}_2\cdot(\text{THF})_x$  in  $\text{C}_6\text{D}_6$  (298K, 151 MHz).

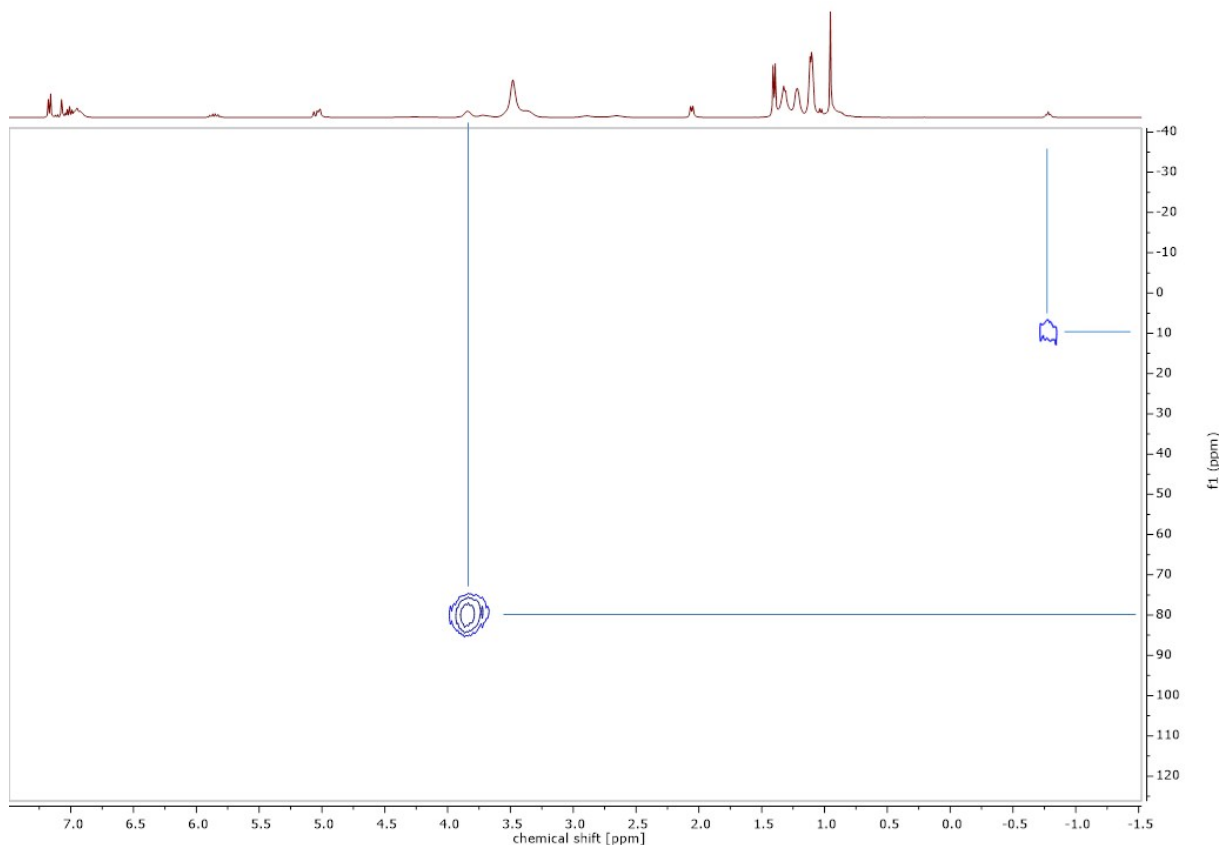

**Figure S19.**  $^{15}\text{N}$  HSQC NMR spectrum of  $(^{\text{DIPPP}}\text{NBN-H})\text{Mg-N(H)CH}_2\text{CMe}_2\text{CH}_2\text{CH}=\text{CH}_2 \cdot (\text{THF})_x$  in  $\text{C}_6\text{D}_6$  (298K, 600 MHz/ 61MHz).

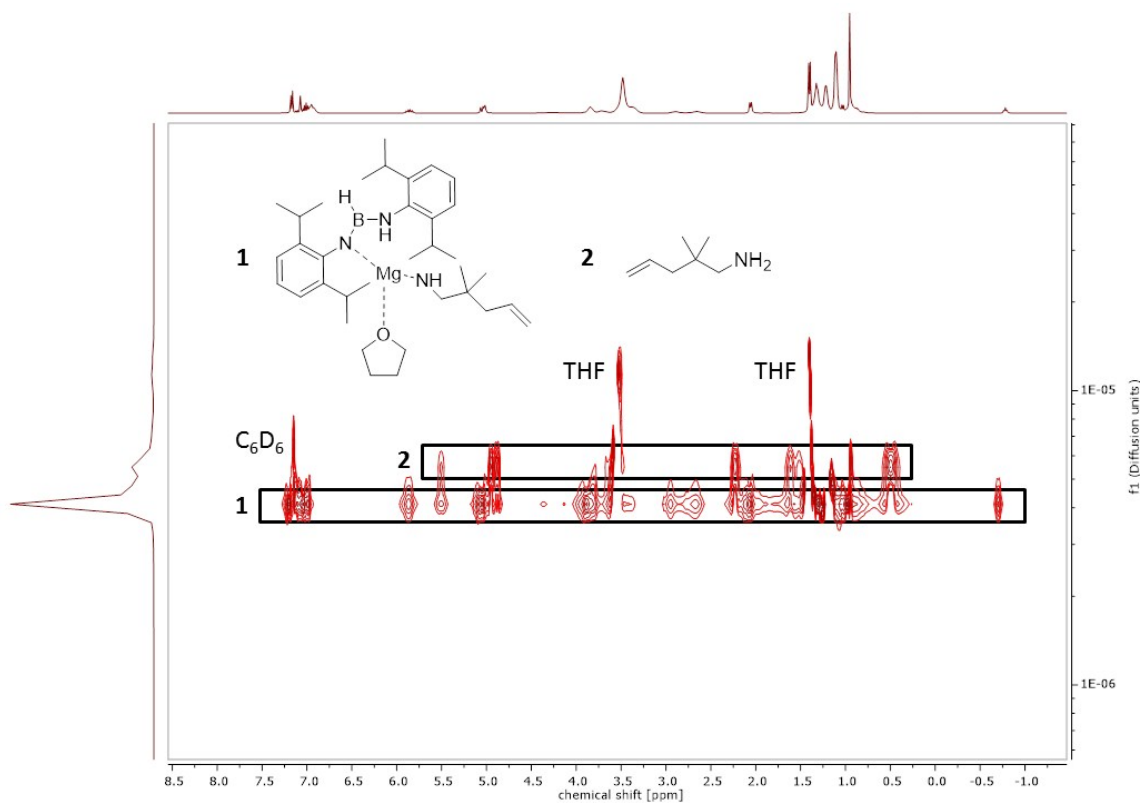

**Figure S20.**  $^1\text{H}$  DOSY NMR spectrum of  $(^{\text{DIPPP}}\text{NBN-H})\text{Mg-N(H)CH}_2\text{CMe}_2\text{CH}_2\text{CH}=\text{CH}_2 \cdot (\text{THF})_x$  in  $\text{C}_6\text{D}_6$  (298K, 600 MHz/ 61MHz) showing from top to bottom molecules of increasing size:  $\text{THF} < \text{NH}_2\text{CH}_2\text{CMe}_2\text{CH}_2\text{CH}=\text{CH}_2 < (^{\text{DIPPP}}\text{NBN-H})\text{Mg-N(H)CH}_2\text{CMe}_2\text{CH}_2\text{CH}=\text{CH}_2 \cdot (\text{THF})_x$ .



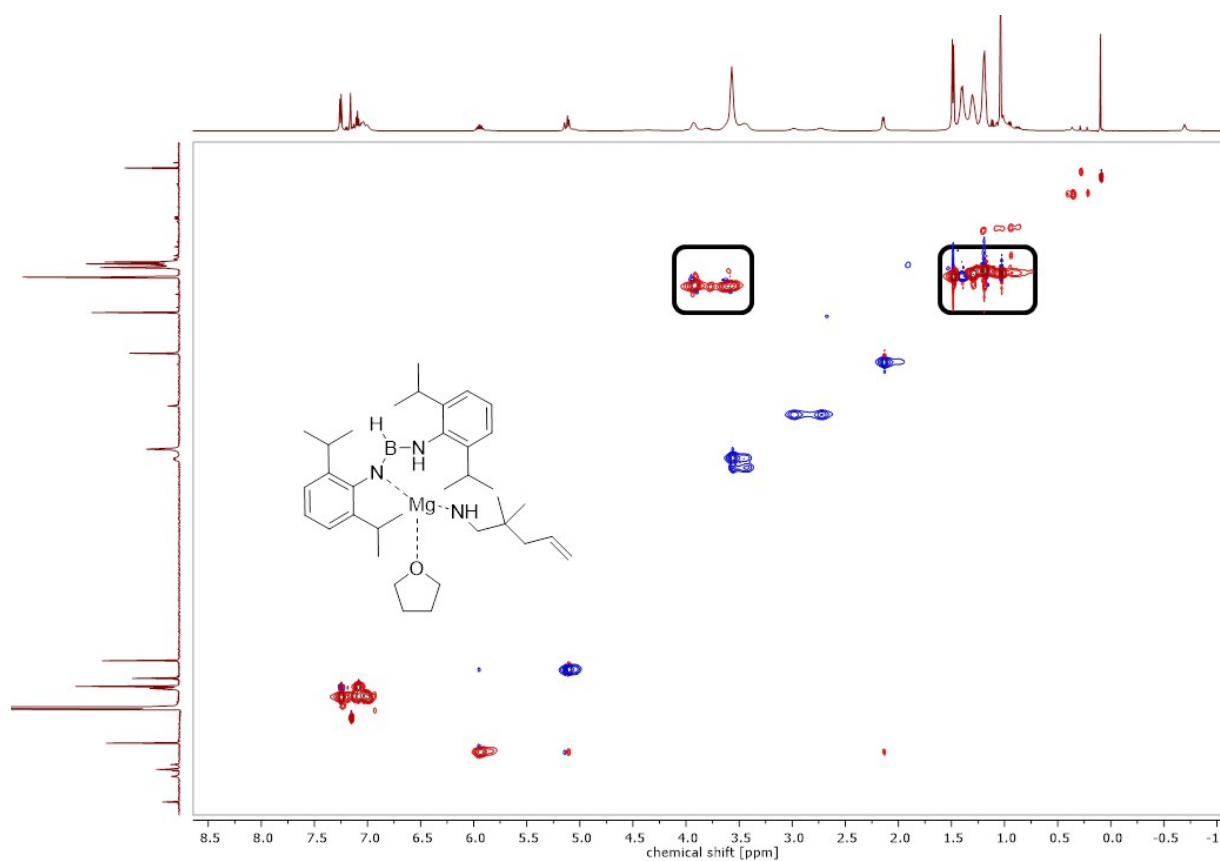

**Figure S21.**  $^{13}\text{C}$  HSQC NMR spectrum of  $(\text{DIPPNBN-H})\text{Mg-N(H)CH}_2\text{CMe}_2\text{CH}_2\text{CH=CH}_2\cdot(\text{THF})_x$  in  $\text{C}_6\text{D}_6$  (298K, 600 MHz/ 151MHz).

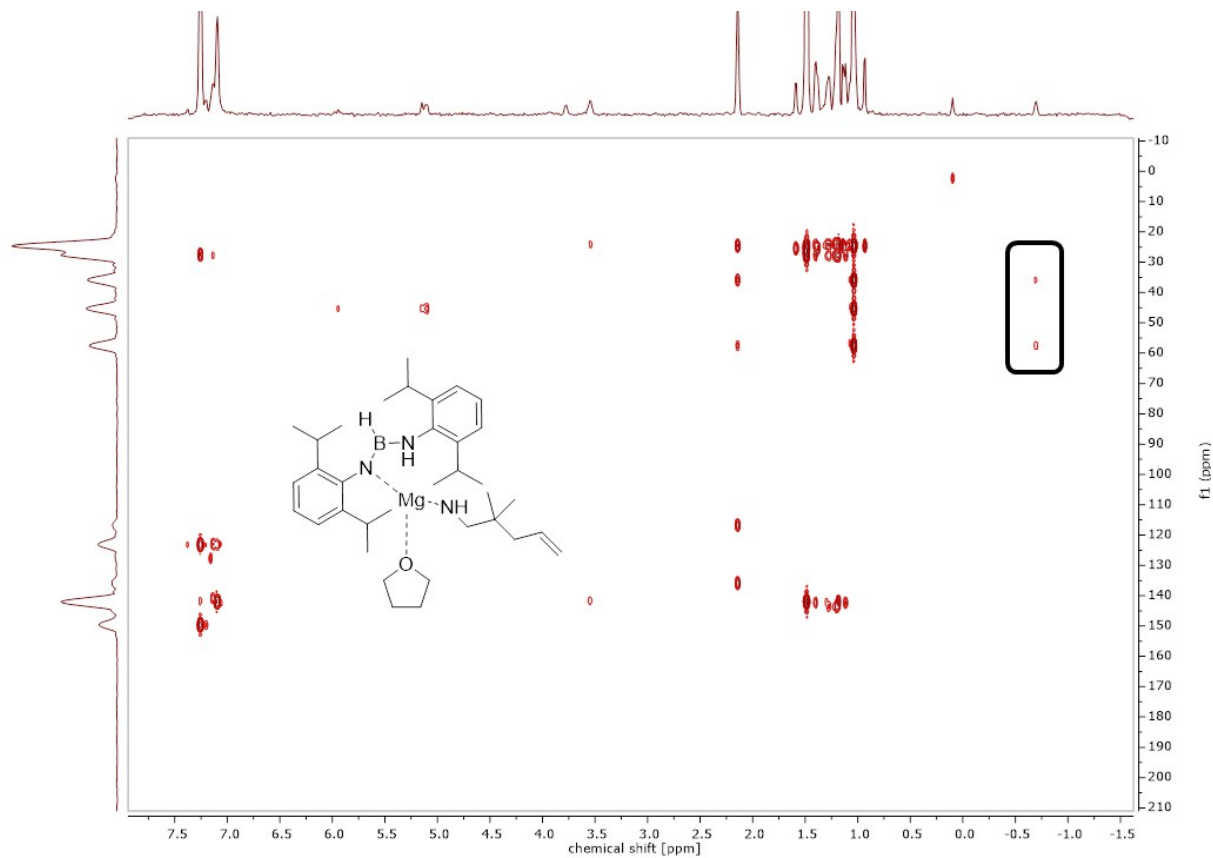

**Figure S22.**  $^{13}\text{C}$  HMBC NMR spectrum of  $(\text{DIPPNBN-H})\text{Mg-N(H)CH}_2\text{CMe}_2\text{CH}_2\text{CH=CH}_2\cdot(\text{THF})_x$  in  $\text{C}_6\text{D}_6$  (298K, 600 MHz/ 151MHz).

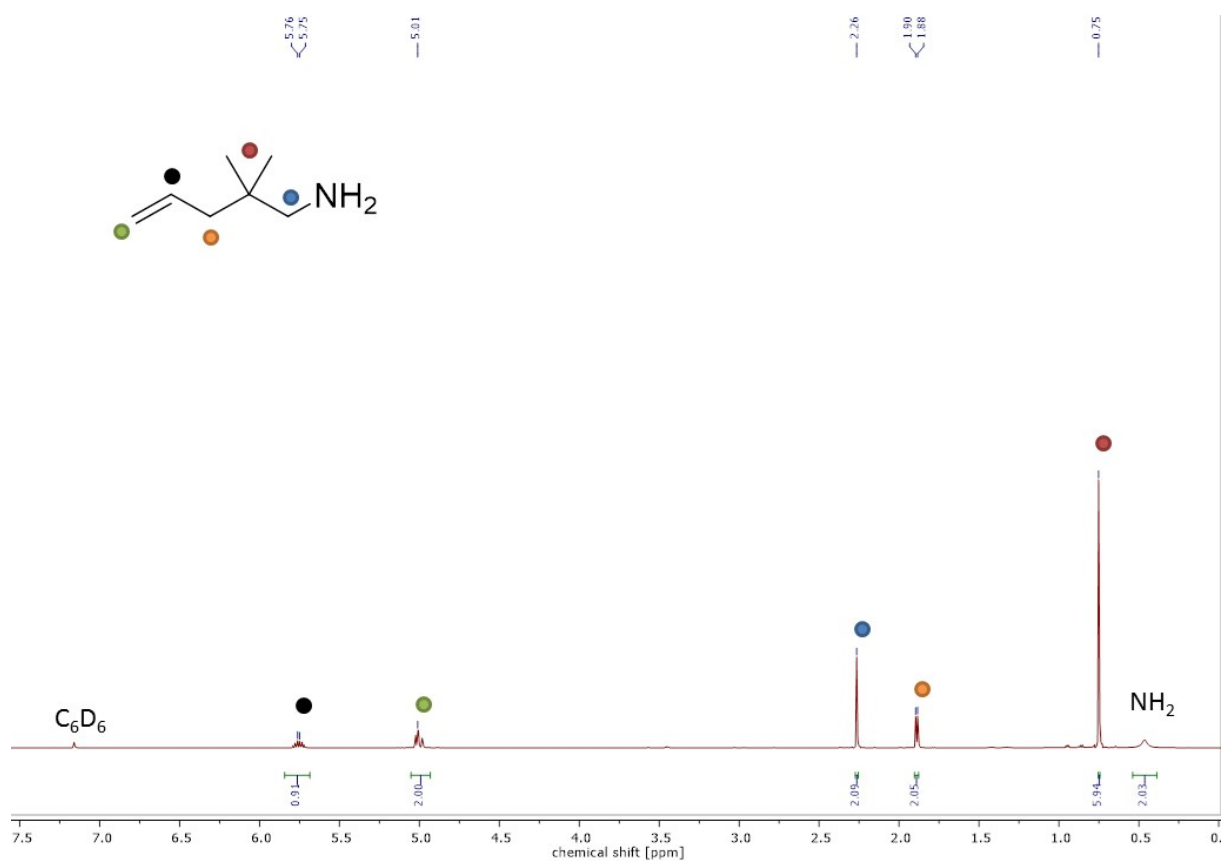

## 4. Theoretical calculations

### General

All calculations were carried out using Gaussian 09 Rev. D.<sup>5</sup> All methods were used as implemented. All molecules were fully optimized on a B3PW91/6-311++G\*\* level<sup>6-10</sup> of theory without any symmetry constraints. All structures were determined to be true minima (NIMAG=0). Charges were calculated using NBO analysis.<sup>11</sup> Structures were drawn using Molecule V2.3.<sup>12</sup> Topological analysis was carried out using AIMAll V16,<sup>13, 14</sup> using the wavefunctions of the optimization. The electron densities in the bond critical point  $r$  are given in au which is  $e \cdot r_{\text{Bohr}}^{-3}$  ( $1 e \cdot r_{\text{Bohr}}^{-3} = 6.755 e \cdot \text{\AA}^{-3}$ ). B3PW91 energies are given in Hartree, zero point energies (ZPE) in kcal/mol.

### XYZ coordinates

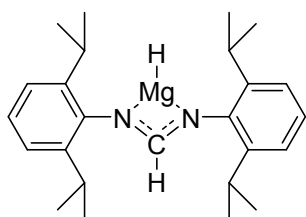

64

ZPE=345.8

| HC(N-DIPP) <sub>2</sub> MgH | B3PW91=-1283.82861 |           | 21        |
|-----------------------------|--------------------|-----------|-----------|
| C                           | 0.000004           | 0.000048  | -0.033641 |
| N                           | 1.124570           | 0.121635  | 0.655816  |
| N                           | -1.124545          | -0.121653 | 0.655824  |
| C                           | 2.366135           | 0.321221  | 0.008954  |
| C                           | -2.366116          | -0.321235 | 0.008974  |
| C                           | -3.375095          | 0.655075  | 0.180573  |
| C                           | -4.611703          | 0.458374  | -0.429029 |
| C                           | -4.863426          | -0.669700 | -1.199947 |
| C                           | -2.622018          | -1.486627 | -0.745874 |
| C                           | -3.874451          | -1.628261 | -1.349452 |
| C                           | -3.128482          | 1.881504  | 1.042728  |
| H                           | -5.391433          | 1.203180  | -0.309783 |
| H                           | -5.829742          | -0.801730 | -1.676019 |
| C                           | -1.611286          | -2.614411 | -0.889010 |
| H                           | -4.080567          | -2.516051 | -1.939899 |
| C                           | 2.621979           | 1.486611  | -0.745905 |
| C                           | 3.874396           | 1.628290  | -1.349506 |
| C                           | 4.863413           | 0.669769  | -1.200004 |
| C                           | 3.375150           | -0.655056 | 0.180544  |

|    |           |           |           |
|----|-----------|-----------|-----------|
| C  | 4.611744  | -0.458308 | -0.429074 |
| C  | 1.611167  | 2.614319  | -0.889062 |
| H  | 4.080465  | 2.516076  | -1.939975 |
| H  | 5.829716  | 0.801832  | -1.676094 |
| C  | 3.128604  | -1.881489 | 1.042712  |
| H  | 5.391505  | -1.203083 | -0.309832 |
| H  | -0.000005 | 0.000117  | -1.129830 |
| C  | 1.161401  | 2.805694  | -2.343013 |
| C  | 2.153770  | 3.927260  | -0.307711 |
| H  | 1.389491  | 4.709970  | -0.350523 |
| H  | 2.457122  | 3.803240  | 0.735522  |
| H  | 3.024273  | 4.284162  | -0.866179 |
| C  | 3.766378  | -3.159233 | 0.490919  |
| C  | 3.586647  | -1.625841 | 2.486255  |
| H  | 2.046189  | -2.044531 | 1.060104  |
| H  | 3.358682  | -2.482731 | 3.128569  |
| H  | 4.667426  | -1.455072 | 2.521598  |
| H  | 3.103208  | -0.743448 | 2.916030  |
| H  | 3.449655  | -4.022902 | 1.083720  |
| H  | 3.475991  | -3.335459 | -0.548512 |
| H  | 4.859303  | -3.125107 | 0.533676  |
| H  | 0.405327  | 3.594163  | -2.413165 |
| H  | 2.001050  | 3.092696  | -2.983591 |
| H  | 0.733283  | 1.888134  | -2.756617 |
| H  | 0.726844  | 2.351827  | -0.303565 |
| C  | -3.766209 | 3.159273  | 0.490939  |
| C  | -3.586508 | 1.625885  | 2.486281  |
| H  | -2.046059 | 2.044497  | 1.060097  |
| C  | -1.161522 | -2.805831 | -2.342956 |
| H  | -0.726951 | -2.351994 | -0.303503 |
| C  | -2.154004 | -3.927307 | -0.307664 |
| H  | -3.358490 | 2.482767  | 3.128586  |
| H  | -4.667294 | 1.455166  | 2.521646  |
| H  | -3.103101 | 0.743471  | 2.916051  |
| H  | -3.449432 | 4.022931  | 1.083726  |
| H  | -3.475837 | 3.335477  | -0.548500 |
| H  | -4.859135 | 3.125198  | 0.533721  |
| H  | -1.389792 | -4.710082 | -0.350469 |
| H  | -2.457355 | -3.803261 | 0.735566  |
| H  | -3.024533 | -4.284134 | -0.866140 |
| H  | -0.405506 | -3.594357 | -2.413095 |
| H  | -2.001186 | -3.092775 | -2.983539 |
| H  | -0.733332 | -1.888306 | -2.756565 |
| Mg | 0.000018  | 0.000007  | 2.418145  |
| H  | 0.000019  | 0.000024  | 4.125381  |



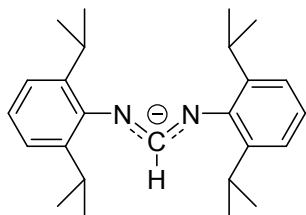

62

| HC(N-DIPP) <sub>2</sub> <sup>-</sup> | B3PW91=-1083.17521 | ZPE=339.375 |           |
|--------------------------------------|--------------------|-------------|-----------|
| C                                    | 0.000001           | 0.000001    | 0.169144  |
| N                                    | -1.164865          | -0.077241   | 0.777762  |
| N                                    | 1.164866           | 0.077243    | 0.777763  |
| C                                    | -2.309493          | -0.332488   | 0.051980  |
| C                                    | 2.309494           | 0.332489    | 0.051982  |
| C                                    | 3.374613           | -0.612961   | 0.110009  |
| C                                    | 4.567842           | -0.356672   | -0.558474 |
| C                                    | 4.753756           | 0.816295    | -1.284383 |
| C                                    | 2.517680           | 1.549074    | -0.662936 |
| C                                    | 3.730899           | 1.757010    | -1.320264 |
| C                                    | 3.176541           | -1.873213   | 0.932643  |
| H                                    | 5.369298           | -1.089404   | -0.524841 |
| H                                    | 5.686355           | 0.996925    | -1.811641 |
| C                                    | 1.473160           | 2.655480    | -0.595557 |
| H                                    | 3.888170           | 2.679978    | -1.870685 |
| C                                    | -2.517676          | -1.549074   | -0.662939 |
| C                                    | -3.730894          | -1.757012   | -1.320267 |
| C                                    | -4.753754          | -0.816299   | -1.284385 |
| C                                    | -3.374613          | 0.612959    | 0.110008  |
| C                                    | -4.567842          | 0.356668    | -0.558474 |
| C                                    | -1.473154          | -2.655478   | -0.595561 |
| H                                    | -3.888164          | -2.679979   | -1.870689 |
| H                                    | -5.686352          | -0.996930   | -1.811643 |
| C                                    | -3.176546          | 1.873210    | 0.932645  |
| H                                    | -5.369300          | 1.089398    | -0.524839 |
| H                                    | 0.000001           | 0.000001    | -0.942957 |
| C                                    | -1.565545          | -3.683039   | -1.724027 |
| C                                    | -1.537492          | -3.345045   | 0.775373  |
| H                                    | -0.760551          | -4.113675   | 0.865014  |
| H                                    | -1.390366          | -2.611500   | 1.571812  |
| H                                    | -2.512649          | -3.824843   | 0.918636  |
| C                                    | -4.024628          | 3.061916    | 0.478909  |
| C                                    | -3.400723          | 1.579938    | 2.423185  |
| H                                    | -2.121179          | 2.144640    | 0.825131  |
| H                                    | -3.200921          | 2.469953    | 3.032659  |
| H                                    | -4.435978          | 1.267182    | 2.604933  |
| H                                    | -2.728349          | 0.783060    | 2.747924  |

|   |           |           |           |
|---|-----------|-----------|-----------|
| H | -3.738783 | 3.961392  | 1.035475  |
| H | -3.892625 | 3.267642  | -0.588181 |
| H | -5.093567 | 2.898776  | 0.659716  |
| H | -0.718418 | -4.375038 | -1.668053 |
| H | -2.478884 | -4.285524 | -1.660013 |
| H | -1.546129 | -3.203948 | -2.708135 |
| H | -0.485473 | -2.194660 | -0.668867 |
| C | 4.024640  | -3.061913 | 0.478924  |
| C | 3.400689  | -1.579938 | 2.423187  |
| H | 2.121178  | -2.144651 | 0.825111  |
| C | 1.565551  | 3.683041  | -1.724024 |
| H | 0.485478  | 2.194664  | -0.668862 |
| C | 1.537500  | 3.345048  | 0.775376  |
| H | 3.200883  | -2.469954 | 3.032658  |
| H | 4.435938  | -1.267174 | 2.604953  |
| H | 2.728302  | -0.783065 | 2.747913  |
| H | 3.738790  | -3.961391 | 1.035485  |
| H | 3.892657  | -3.267641 | -0.588169 |
| H | 5.093574  | -2.898765 | 0.659750  |
| H | 0.760559  | 4.113679  | 0.865018  |
| H | 1.390373  | 2.611503  | 1.571815  |
| H | 2.512658  | 3.824844  | 0.918639  |
| H | 0.718425  | 4.375041  | -1.668050 |
| H | 2.478892  | 4.285524  | -1.660011 |
| H | 1.546134  | 3.203950  | -2.708132 |

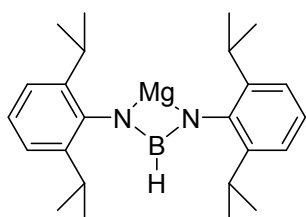

63

|              |                    |             |           |
|--------------|--------------------|-------------|-----------|
| DIPPE-NBN-Mg | B3PW91=-1269.99268 | ZPE=338.735 |           |
| B            | -0.000001          | 0.576190    | -0.300631 |
| N            | -1.191763          | -0.078097   | 0.186862  |
| N            | 1.191763           | -0.078094   | 0.186861  |
| C            | -2.541909          | 0.050640    | -0.043538 |
| C            | 2.541909           | 0.050640    | -0.043538 |
| C            | 3.302625           | -1.150902   | -0.204002 |
| C            | 4.679007           | -1.094000   | -0.392624 |
| C            | 5.345336           | 0.125779    | -0.429650 |
| C            | 3.234886           | 1.290364    | -0.063798 |
| C            | 4.615254           | 1.294295    | -0.264073 |
| C            | 2.567784           | -2.481096   | -0.190580 |

|   |           |           |           |
|---|-----------|-----------|-----------|
| H | 5.246764  | -2.009116 | -0.526310 |
| H | 6.418416  | 0.162203  | -0.585293 |
| C | 2.516373  | 2.609792  | 0.152271  |
| H | 5.138421  | 2.246413  | -0.283266 |
| C | -3.302625 | -1.150901 | -0.204012 |
| C | -4.679006 | -1.093998 | -0.392635 |
| C | -5.345335 | 0.125782  | -0.429652 |
| C | -3.234886 | 1.290364  | -0.063789 |
| C | -4.615253 | 1.294297  | -0.264066 |
| C | -2.567785 | -2.481096 | -0.190600 |
| H | -5.246764 | -2.009112 | -0.526329 |
| H | -6.418415 | 0.162208  | -0.585296 |
| C | -2.516372 | 2.609790  | 0.152293  |
| H | -5.138420 | 2.246415  | -0.283252 |
| H | -0.000003 | 1.464481  | -1.107770 |
| C | -3.291606 | -3.638583 | -0.877272 |
| C | -2.181730 | -2.902485 | 1.248177  |
| H | -1.381128 | -3.662819 | 1.274587  |
| H | -1.934002 | -2.039018 | 1.887407  |
| H | -3.034315 | -3.364839 | 1.754157  |
| C | -2.447258 | 3.433902  | -1.139202 |
| C | -3.135846 | 3.428230  | 1.292347  |
| H | -1.491179 | 2.374260  | 0.447611  |
| H | -2.547686 | 4.333766  | 1.474915  |
| H | -4.158073 | 3.744049  | 1.060790  |
| H | -3.168119 | 2.851596  | 2.221355  |
| H | -1.883587 | 4.359551  | -0.980737 |
| H | -1.958628 | 2.871745  | -1.938891 |
| H | -3.449626 | 3.707529  | -1.486113 |
| H | -2.654793 | -4.529053 | -0.905796 |
| H | -4.209711 | -3.912519 | -0.348817 |
| H | -3.556735 | -3.379336 | -1.904763 |
| H | -1.645309 | -2.310431 | -0.772960 |
| C | 3.291606  | -3.638589 | -0.877242 |
| C | 2.181728  | -2.902474 | 1.248200  |
| H | 1.645310  | -2.310436 | -0.772944 |
| C | 2.447255  | 3.433889  | -1.139233 |
| H | 1.491181  | 2.374265  | 0.447595  |
| C | 3.135849  | 3.428246  | 1.292315  |
| H | 1.381129  | -3.662810 | 1.274616  |
| H | 3.034314  | -3.364821 | 1.754185  |
| H | 1.933998  | -2.039002 | 1.887423  |
| H | 2.654793  | -4.529059 | -0.905758 |
| H | 3.556735  | -3.379351 | -1.904736 |
| H | 4.209711  | -3.912521 | -0.348785 |



|    |          |           |           |
|----|----------|-----------|-----------|
| H  | 2.547687 | 4.333783  | 1.474872  |
| H  | 3.168125 | 2.851624  | 2.221329  |
| H  | 4.158074 | 3.744065  | 1.060751  |
| H  | 1.883583 | 4.359539  | -0.980778 |
| H  | 3.449622 | 3.707513  | -1.486150 |
| H  | 1.958623 | 2.871722  | -1.938915 |
| Mg | 0.000001 | -1.477618 | 0.846881  |

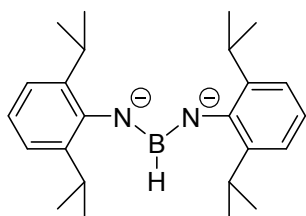

62

|                        |                    |             |           |
|------------------------|--------------------|-------------|-----------|
| DIPP-NBN <sup>2-</sup> | B3PW91=-1069.89048 | ZPE=333.516 |           |
| B                      | 0.000000           | 0.000000    | -0.397818 |
| N                      | -1.254631          | 0.118437    | 0.242078  |
| N                      | 1.254631           | -0.118437   | 0.242078  |
| C                      | -2.509629          | -0.152708   | -0.061643 |
| C                      | 2.509629           | 0.152708    | -0.061643 |
| C                      | 3.551687           | -0.840327   | 0.161229  |
| C                      | 4.887460           | -0.548819   | -0.067399 |
| C                      | 5.309116           | 0.704262    | -0.526983 |
| C                      | 2.977276           | 1.442249    | -0.551577 |
| C                      | 4.330340           | 1.677708    | -0.754772 |
| C                      | 3.100580           | -2.188128   | 0.684126  |
| H                      | 5.637701           | -1.320407   | 0.106658  |
| H                      | 6.360626           | 0.910898    | -0.712520 |
| C                      | 1.951358           | 2.546893    | -0.724704 |
| H                      | 4.648548           | 2.658517    | -1.108503 |
| C                      | -2.977276          | -1.442249   | -0.551577 |
| C                      | -4.330340          | -1.677708   | -0.754772 |
| C                      | -5.309116          | -0.704262   | -0.526983 |
| C                      | -3.551687          | 0.840327    | 0.161229  |
| C                      | -4.887460          | 0.548819    | -0.067399 |
| C                      | -1.951358          | -2.546893   | -0.724704 |
| H                      | -4.648548          | -2.658517   | -1.108503 |
| H                      | -6.360626          | -0.910897   | -0.712519 |
| C                      | -3.100580          | 2.188128    | 0.684126  |
| H                      | -5.637701          | 1.320408    | 0.106658  |
| H                      | 0.000000           | 0.000000    | -1.644414 |
| C                      | -2.326148          | -3.612848   | -1.755275 |
| C                      | -1.626162          | -3.190440   | 0.631501  |
| H                      | -0.827748          | -3.939205   | 0.540355  |

|   |           |           |           |
|---|-----------|-----------|-----------|
| H | -1.289325 | -2.418862 | 1.328475  |
| H | -2.516252 | -3.680659 | 1.048035  |
| C | -4.023892 | 3.354914  | 0.330774  |
| C | -2.851947 | 2.129315  | 2.198679  |
| H | -2.119752 | 2.362852  | 0.223691  |
| H | -2.432183 | 3.073520  | 2.574313  |
| H | -3.787745 | 1.929807  | 2.737862  |
| H | -2.138889 | 1.327922  | 2.407738  |
| H | -3.574643 | 4.306133  | 0.644911  |
| H | -4.208834 | 3.403651  | -0.747966 |
| H | -4.997942 | 3.277011  | 0.831715  |
| H | -1.490459 | -4.308686 | -1.902813 |
| H | -3.192443 | -4.209369 | -1.439822 |
| H | -2.567967 | -3.159817 | -2.722883 |
| H | -1.031543 | -2.065381 | -1.070785 |
| C | 4.023893  | -3.354914 | 0.330774  |
| C | 2.851948  | -2.129315 | 2.198679  |
| H | 2.119752  | -2.362853 | 0.223691  |
| C | 2.326147  | 3.612848  | -1.755275 |
| H | 1.031543  | 2.065381  | -1.070785 |
| C | 1.626162  | 3.190440  | 0.631501  |
| H | 2.432184  | -3.073520 | 2.574313  |
| H | 3.787745  | -1.929807 | 2.737862  |
| H | 2.138889  | -1.327922 | 2.407738  |
| H | 3.574644  | -4.306133 | 0.644911  |
| H | 4.208835  | -3.403651 | -0.747966 |
| H | 4.997943  | -3.277011 | 0.831715  |
| H | 0.827747  | 3.939205  | 0.540355  |
| H | 1.289325  | 2.418861  | 1.328475  |
| H | 2.516252  | 3.680659  | 1.048035  |
| H | 1.490458  | 4.308686  | -1.902812 |
| H | 3.192442  | 4.209370  | -1.439822 |
| H | 2.567966  | 3.159818  | -2.722883 |

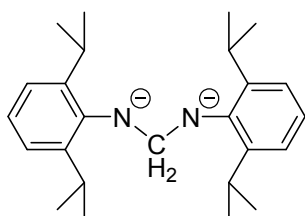

63

|                                            |                    |           |             |
|--------------------------------------------|--------------------|-----------|-------------|
| $\text{H}_2\text{C}(\text{N-DIPP})_2^{2-}$ | B3PW91=-1083.64798 |           | ZPE=342.982 |
| C                                          | -0.000001          | -0.313026 | -0.000005   |
| N                                          | -1.171949          | 0.518365  | 0.115383    |
| N                                          | 1.171948           | 0.518366  | -0.115392   |

|   |           |           |           |
|---|-----------|-----------|-----------|
| C | -2.414249 | 0.089985  | -0.019822 |
| C | 2.414247  | 0.089986  | 0.019821  |
| C | 3.422428  | 1.138332  | 0.242972  |
| C | 4.728858  | 0.830120  | 0.559947  |
| C | 5.191927  | -0.494748 | 0.635013  |
| C | 2.961596  | -1.271703 | -0.041765 |
| C | 4.292583  | -1.506171 | 0.298194  |
| C | 2.931935  | 2.569847  | 0.167877  |
| H | 5.427520  | 1.639223  | 0.771015  |
| H | 6.218642  | -0.721302 | 0.912120  |
| C | 2.152795  | -2.393451 | -0.679887 |
| H | 4.664511  | -2.529443 | 0.274474  |
| C | -2.961600 | -1.271703 | 0.041768  |
| C | -4.292589 | -1.506169 | -0.298179 |
| C | -5.191936 | -0.494746 | -0.634991 |
| C | -3.422431 | 1.138332  | -0.242969 |
| C | -4.728864 | 0.830122  | -0.559931 |
| C | -2.152794 | -2.393453 | 0.679880  |
| H | -4.664519 | -2.529441 | -0.274455 |
| H | -6.218654 | -0.721299 | -0.912088 |
| C | -2.931935 | 2.569847  | -0.167881 |
| H | -5.427526 | 1.639225  | -0.770995 |
| C | -2.683205 | -3.807959 | 0.429439  |
| C | -2.025851 | -2.147552 | 2.192709  |
| H | -1.355964 | -2.880039 | 2.665419  |
| H | -1.625994 | -1.147196 | 2.378437  |
| H | -3.011402 | -2.213329 | 2.671967  |
| C | -3.800576 | 3.589018  | -0.905490 |
| C | -2.715940 | 3.004518  | 1.289418  |
| H | -1.932423 | 2.548972  | -0.622797 |
| H | -2.274799 | 4.010195  | 1.344707  |
| H | -3.666740 | 3.014819  | 1.839587  |
| H | -2.027436 | 2.303624  | 1.766947  |
| H | -3.318451 | 4.575254  | -0.894094 |
| H | -3.958601 | 3.299441  | -1.950329 |
| H | -4.788642 | 3.706523  | -0.439759 |
| H | -1.983419 | -4.546229 | 0.840198  |
| H | -3.654856 | -3.977234 | 0.909669  |
| H | -2.798437 | -4.007838 | -0.641458 |
| H | -1.138285 | -2.377997 | 0.275305  |
| C | 3.800570  | 3.589019  | 0.905491  |
| C | 2.715955  | 3.004515  | -1.289427 |
| H | 1.932418  | 2.548974  | 0.622782  |
| C | 2.683207  | -3.807957 | -0.429450 |
| H | 1.138283  | -2.377998 | -0.275319 |

|   |           |           |           |
|---|-----------|-----------|-----------|
| C | 2.025861  | -2.147543 | -2.192715 |
| H | 2.274816  | 4.010191  | -1.344723 |
| H | 3.666762  | 3.014813  | -1.839585 |
| H | 2.027457  | 2.303620  | -1.766961 |
| H | 3.318447  | 4.575256  | 0.894086  |
| H | 3.958581  | 3.299446  | 1.950334  |
| H | 4.788642  | 3.706519  | 0.439772  |
| H | 1.355977  | -2.880027 | -2.665433 |
| H | 1.626006  | -1.147185 | -2.378441 |
| H | 3.011415  | -2.213317 | -2.671968 |
| H | 1.983425  | -4.546226 | -0.840217 |
| H | 3.654861  | -3.977229 | -0.909674 |
| H | 2.798432  | -4.007843 | 0.641447  |
| H | 0.128374  | -0.988402 | 0.879879  |
| H | -0.128374 | -0.988400 | -0.879891 |

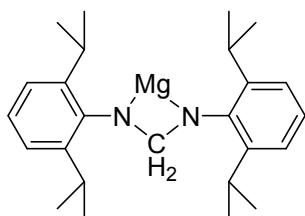

64

|                                          |                    |           |             |
|------------------------------------------|--------------------|-----------|-------------|
| H <sub>2</sub> C(N-DIPP) <sub>2</sub> Mg | B3PW91=-1283.76101 |           | ZPE=348.153 |
| C                                        | -0.000019          | 0.759113  | -0.105520   |
| N                                        | -1.147242          | -0.128251 | 0.133042    |
| N                                        | 1.147222           | -0.128256 | 0.132940    |
| C                                        | -2.474031          | 0.061799  | -0.121883   |
| C                                        | 2.474016           | 0.061812  | -0.121916   |
| C                                        | 3.261985           | -1.141022 | -0.228657   |
| C                                        | 4.632313           | -1.076215 | -0.455263   |
| C                                        | 5.283197           | 0.141372  | -0.591558   |
| C                                        | 3.161430           | 1.309948  | -0.256817   |
| C                                        | 4.533898           | 1.307410  | -0.492428   |
| C                                        | 2.566528           | -2.486055 | -0.146967   |
| H                                        | 5.207160           | -1.992210 | -0.542463   |
| H                                        | 6.351500           | 0.182711  | -0.773588   |
| C                                        | 2.455090           | 2.638188  | -0.021767   |
| H                                        | 5.046100           | 2.258460  | -0.590076   |
| C                                        | -3.261963          | -1.141034 | -0.228838   |
| C                                        | -4.632280          | -1.076222 | -0.455517   |
| C                                        | -5.283175          | 0.141372  | -0.591695   |
| C                                        | -3.161458          | 1.309941  | -0.256641   |
| C                                        | -4.533908          | 1.307415  | -0.492353   |
| C                                        | -2.566476          | -2.486062 | -0.147309   |
| H                                        | -5.207105          | -1.992215 | -0.542880   |

|    |           |           |           |
|----|-----------|-----------|-----------|
| H  | -6.351466 | 0.182715  | -0.773794 |
| C  | -2.455143 | 2.638144  | -0.021309 |
| H  | -5.046126 | 2.258467  | -0.589900 |
| C  | -3.344250 | -3.672665 | -0.716017 |
| C  | -2.111268 | -2.827038 | 1.293894  |
| H  | -1.337444 | -3.617503 | 1.325292  |
| H  | -1.794036 | -1.936397 | 1.857761  |
| H  | -2.948819 | -3.230702 | 1.868755  |
| C  | -3.122656 | 3.842430  | -0.691070 |
| C  | -2.300959 | 2.890509  | 1.486723  |
| H  | -1.454936 | 2.574916  | -0.452609 |
| H  | -1.718374 | 3.798248  | 1.678861  |
| H  | -3.284907 | 3.013497  | 1.951756  |
| H  | -1.802828 | 2.053000  | 1.982541  |
| H  | -2.481782 | 4.723798  | -0.589203 |
| H  | -3.291009 | 3.668767  | -1.757847 |
| H  | -4.083972 | 4.092718  | -0.231515 |
| H  | -2.727595 | -4.577557 | -0.702859 |
| H  | -4.242381 | -3.882859 | -0.127821 |
| H  | -3.649705 | -3.485422 | -1.747718 |
| H  | -1.670989 | -2.387938 | -0.802176 |
| C  | 3.344375  | -3.672727 | -0.715432 |
| C  | 2.111233  | -2.826817 | 1.294261  |
| H  | 1.671083  | -2.388067 | -0.801917 |
| C  | 3.122520  | 3.842322  | -0.691892 |
| H  | 1.454856  | 2.574820  | -0.452978 |
| C  | 2.301011  | 2.890944  | 1.486210  |
| H  | 1.337419  | -3.617289 | 1.325735  |
| H  | 2.948756  | -3.230383 | 1.869231  |
| H  | 1.793951  | -1.936094 | 1.857970  |
| H  | 2.727746  | -4.577635 | -0.702166 |
| H  | 3.649892  | -3.485642 | -1.747144 |
| H  | 4.242473  | -3.882796 | -0.127142 |
| H  | 1.718404  | 3.798711  | 1.678153  |
| H  | 1.802953  | 2.053549  | 1.982295  |
| H  | 3.284989  | 3.014095  | 1.951137  |
| H  | 2.481629  | 4.723698  | -0.590213 |
| H  | 4.083861  | 4.092760  | -0.232471 |
| H  | 3.290804  | 3.668379  | -1.758634 |
| Mg | 0.000002  | -1.658084 | 0.495088  |
| H  | -0.000077 | 1.143476  | -1.139835 |
| H  | 0.000024  | 1.615298  | 0.583081  |

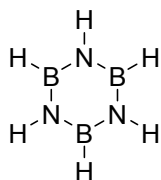

12

|          |                  |           |            |
|----------|------------------|-----------|------------|
| Borazine | B3PW91=242.6.513 |           | ZPE=58.514 |
| N        | 1.252497         | -0.642488 | -0.000282  |
| B        | 0.071784         | -1.447097 | -0.000221  |
| N        | -1.182791        | -0.763359 | 0.000541   |
| B        | -1.289676        | 0.661631  | -0.000143  |
| B        | 1.217731         | 0.785786  | 0.000276   |
| N        | -0.069713        | 1.405709  | -0.000428  |
| H        | -2.029371        | -1.310762 | 0.000263   |
| H        | -2.352965        | 1.207294  | -0.000440  |
| H        | -0.119216        | 2.412650  | 0.000454   |
| H        | 0.131332         | -2.640868 | -0.000373  |
| H        | 2.149349         | -1.103159 | 0.000017   |
| H        | 2.221719         | 1.434209  | 0.001701   |

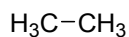

8

|        |                  |           |            |
|--------|------------------|-----------|------------|
| Ethane | B3PW91=-79.82452 |           | ZPE=46.717 |
| C      | 0.762339         | -0.000004 | -0.000003  |
| C      | -0.762334        | 0.000010  | 0.000006   |
| H      | -1.161827        | -0.934684 | 0.404597   |
| H      | -1.161790        | 0.817752  | 0.607142   |
| H      | 1.161825         | 0.934900  | -0.404110  |
| H      | 1.161841         | -0.117518 | 1.011674   |
| H      | 1.161797         | -0.817393 | -0.607599  |
| H      | -1.161876        | 0.116906  | -1.011718  |

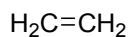

6

|        |                  |           |            |
|--------|------------------|-----------|------------|
| Ethene | B3PW91=-78.58047 |           | ZPE=31.899 |
| C      | 0.000000         | 0.000000  | 0.663740   |
| C      | 0.000000         | 0.000000  | -0.663740  |
| H      | 0.000000         | 0.923426  | -1.235289  |
| H      | 0.000000         | -0.923426 | -1.235289  |
| H      | 0.000000         | -0.923426 | 1.235289   |
| H      | 0.000000         | 0.923426  | 1.235289   |

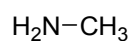

7

|        |                  |           |            |
|--------|------------------|-----------|------------|
| H2NCH3 | B3PW91=-95.85628 |           | ZPE=40.164 |
| C      | 0.704328         | 0.000000  | 0.017659   |
| N      | -0.746718        | 0.000000  | -0.118860  |
| H      | -1.155155        | 0.814583  | 0.323742   |
| H      | 1.115062         | -0.878784 | -0.486915  |
| H      | 1.115062         | 0.878784  | -0.486915  |
| H      | -1.155155        | -0.814583 | 0.323742   |
| H      | 1.081247         | 0.000000  | 1.052412   |

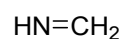

5

|        |                  |           |            |
|--------|------------------|-----------|------------|
| HN=CH2 | B3PW91=-94.62131 |           | ZPE=31.899 |
| C      | -0.585205        | 0.028821  | -0.000365  |
| N      | 0.666897         | -0.154162 | 0.000161   |
| H      | 1.164727         | 0.738838  | -0.000356  |
| H      | -1.244378        | -0.842302 | 0.000506   |
| H      | -1.077398        | 1.009670  | 0.000917   |

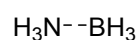

8

|        |                  |           |            |
|--------|------------------|-----------|------------|
| H3NBH3 | B3PW91=-83.21339 |           | ZPE=43.787 |
| B      | 0.926417         | -0.000056 | 0.000021   |
| N      | -0.725832        | -0.000030 | -0.000001  |
| H      | 1.241501         | -0.540299 | 1.037348   |
| H      | 1.241546         | -0.628202 | -0.986627  |
| H      | -1.091575        | 0.437810  | -0.841193  |
| H      | -1.091767        | 0.509652  | 0.799632   |
| H      | -1.092050        | -0.947317 | 0.041468   |
| H      | 1.241086         | 1.168846  | -0.050726  |

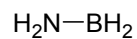

6

|        |                  |           |            |
|--------|------------------|-----------|------------|
| H2NBH2 | B3PW91=-82.03437 |           | ZPE=30.059 |
| B      | 0.778353         | -0.000030 | 0.000096   |
| N      | -0.611254        | -0.000065 | 0.000156   |
| H      | 1.356583         | 1.046696  | -0.000155  |
| H      | 1.357477         | -1.046267 | -0.000454  |
| H      | -1.163758        | -0.843330 | -0.000296  |
| H      | -1.163288        | 0.843506  | -0.000666  |

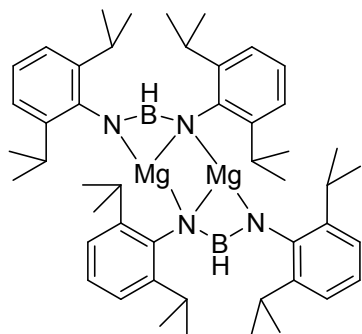

126

| NBN-Dimer | B3PW91=-2540.09987 | ZPE=      |           |
|-----------|--------------------|-----------|-----------|
| B         | 1.965200           | -1.733554 | -0.102540 |
| N         | 0.604777           | -1.487561 | 0.389170  |
| N         | 2.716354           | -0.582972 | -0.429262 |
| C         | -0.167700          | -2.521386 | 0.983179  |
| C         | 3.993706           | -0.545805 | -0.993886 |
| C         | 5.046148           | 0.108903  | -0.296295 |
| C         | 6.314372           | 0.175988  | -0.868994 |
| C         | 6.578048           | -0.386605 | -2.111589 |
| C         | 4.259863           | -1.099373 | -2.271585 |
| C         | 5.550270           | -1.013518 | -2.797462 |
| C         | 4.802883           | 0.684288  | 1.087783  |
| H         | 7.118192           | 0.671357  | -0.334726 |
| H         | 7.573847           | -0.331665 | -2.539767 |
| C         | 3.181870           | -1.763872 | -3.111450 |
| H         | 5.752317           | -1.445078 | -3.774055 |
| C         | -0.010833          | -2.889177 | 2.349847  |
| C         | -0.899032          | -3.802916 | 2.911479  |
| C         | -1.942518          | -4.357660 | 2.180036  |
| C         | -1.212716          | -3.131446 | 0.218831  |
| C         | -2.089777          | -4.025749 | 0.845212  |
| C         | 1.142162           | -2.357511 | 3.178833  |
| H         | -0.777004          | -4.086946 | 3.951900  |
| H         | -2.628303          | -5.055505 | 2.649014  |
| C         | -1.283672          | -2.962288 | -1.300069 |
| H         | -2.884546          | -4.483195 | 0.267241  |
| H         | 2.389611           | -2.858243 | -0.159533 |
| C         | 2.278382           | -3.390018 | 3.228739  |
| C         | 0.733108           | -1.939626 | 4.594580  |
| H         | 1.572085           | -1.450042 | 5.098062  |
| H         | -0.110437          | -1.244339 | 4.586433  |
| H         | 0.450681           | -2.800006 | 5.208930  |
| C         | -0.381758          | -4.018363 | -1.958885 |
| C         | -2.696763          | -3.011607 | -1.885013 |
| H         | -0.841583          | -1.992336 | -1.578342 |



|    |           |           |           |
|----|-----------|-----------|-----------|
| H  | -2.657474 | -2.792273 | -2.955243 |
| H  | -3.145038 | -4.003865 | -1.780702 |
| H  | -3.369326 | -2.282329 | -1.425128 |
| H  | -0.377518 | -3.894702 | -3.046021 |
| H  | 0.645853  | -3.946557 | -1.597495 |
| H  | -0.752703 | -5.022532 | -1.730666 |
| H  | 3.129342  | -2.999572 | 3.795219  |
| H  | 1.941557  | -4.310613 | 3.716856  |
| H  | 2.625090  | -3.649776 | 2.225980  |
| H  | 1.525444  | -1.472096 | 2.662680  |
| C  | 4.880497  | -0.417366 | 2.153311  |
| C  | 5.719051  | 1.851322  | 1.459507  |
| H  | 3.774700  | 1.074665  | 1.098039  |
| C  | 3.484495  | -3.246114 | -3.360492 |
| H  | 2.247364  | -1.708637 | -2.547840 |
| C  | 2.955999  | -1.021483 | -4.435417 |
| H  | 5.388253  | 2.301034  | 2.400619  |
| H  | 6.753840  | 1.526312  | 1.605673  |
| H  | 5.716048  | 2.629720  | 0.691432  |
| H  | 4.631623  | -0.025143 | 3.145939  |
| H  | 4.197411  | -1.236791 | 1.920975  |
| H  | 5.894002  | -0.828994 | 2.197562  |
| H  | 2.135501  | -1.477653 | -4.999751 |
| H  | 2.706654  | 0.029315  | -4.262384 |
| H  | 3.847594  | -1.048319 | -5.069894 |
| H  | 2.677195  | -3.717668 | -3.930939 |
| H  | 4.409889  | -3.372470 | -3.931719 |
| H  | 3.600294  | -3.787994 | -2.418172 |
| Mg | 1.263708  | 0.559472  | 0.235249  |
| B  | -1.965199 | 1.733565  | -0.102248 |
| N  | -0.604783 | 1.487488  | 0.389440  |
| N  | -2.716361 | 0.583037  | -0.429144 |
| C  | 0.167717  | 2.521219  | 0.983584  |
| C  | -3.993714 | 0.545966  | -0.993771 |
| C  | -5.046145 | -0.108891 | -0.296301 |
| C  | -6.314373 | -0.175874 | -0.869003 |
| C  | -6.578066 | 0.386962  | -2.111483 |
| C  | -4.259887 | 1.099781  | -2.271359 |
| C  | -5.550299 | 1.014019  | -2.797242 |
| C  | -4.802865 | -0.684554 | 1.087660  |
| H  | -7.118184 | -0.671356 | -0.334825 |
| H  | -7.573868 | 0.332099  | -2.539664 |
| C  | -3.181908 | 1.764449  | -3.111110 |
| H  | -5.752356 | 1.445767  | -3.773749 |
| C  | 0.010890  | 2.888800  | 2.350315  |

|   |           |           |           |
|---|-----------|-----------|-----------|
| C | 0.899119  | 3.802436  | 2.912067  |
| C | 1.942595  | 4.357278  | 2.180683  |
| C | 1.212722  | 3.131383  | 0.219305  |
| C | 2.089813  | 4.025575  | 0.845803  |
| C | -1.142103 | 2.357025  | 3.179234  |
| H | 0.777127  | 4.086302  | 3.952536  |
| H | 2.628404  | 5.055036  | 2.649753  |
| C | 1.283641  | 2.962461  | -1.299623 |
| H | 2.884576  | 4.483099  | 0.267884  |
| H | -2.389598 | 2.858266  | -0.159088 |
| C | -2.278414 | 3.389436  | 3.229076  |
| C | -0.733112 | 1.939177  | 4.595010  |
| H | -1.572065 | 1.449462  | 5.098404  |
| H | 0.110536  | 1.244014  | 4.586934  |
| H | -0.450877 | 2.799591  | 5.209402  |
| C | 0.381741  | 4.018663  | -1.958255 |
| C | 2.696721  | 3.011837  | -1.884589 |
| H | 0.841521  | 1.992564  | -1.578036 |
| H | 2.657404  | 2.792670  | -2.954851 |
| H | 3.145021  | 4.004069  | -1.780134 |
| H | 3.369278  | 2.282474  | -1.424830 |
| H | 0.377477  | 3.895173  | -3.045411 |
| H | -0.645865 | 3.946827  | -1.596857 |
| H | 0.752717  | 5.022787  | -1.729885 |
| H | -3.129368 | 2.998923  | 3.795519  |
| H | -1.941684 | 4.310060  | 3.717204  |
| H | -2.625096 | 3.649162  | 2.226300  |
| H | -1.525276 | 1.471578  | 2.663052  |
| C | -4.880459 | 0.416887  | 2.153410  |
| C | -5.719035 | -1.851657 | 1.459162  |
| H | -3.774685 | -1.074940 | 1.097825  |
| C | -3.484550 | 3.246733  | -3.359873 |
| H | -2.247396 | 1.709120  | -2.547520 |
| C | -2.956043 | 1.022306  | -4.435216 |
| H | -5.388225 | -2.301560 | 2.400179  |
| H | -6.753819 | -1.526670 | 1.605410  |
| H | -5.716049 | -2.629900 | 0.690930  |
| H | -4.631571 | 0.024463  | 3.145956  |
| H | -4.197372 | 1.236354  | 1.921227  |
| H | -5.893961 | 0.828510  | 2.197760  |
| H | -2.135557 | 1.478590  | -4.999474 |
| H | -2.706683 | -0.028520 | -4.262378 |
| H | -3.847645 | 1.049247  | -5.069678 |
| H | -2.677262 | 3.718401  | -3.930242 |
| H | -4.409952 | 3.373188  | -3.931065 |

|    |           |           |           |
|----|-----------|-----------|-----------|
| H  | -3.600342 | 3.788438  | -2.417451 |
| Mg | -1.263717 | -0.559521 | 0.235173  |

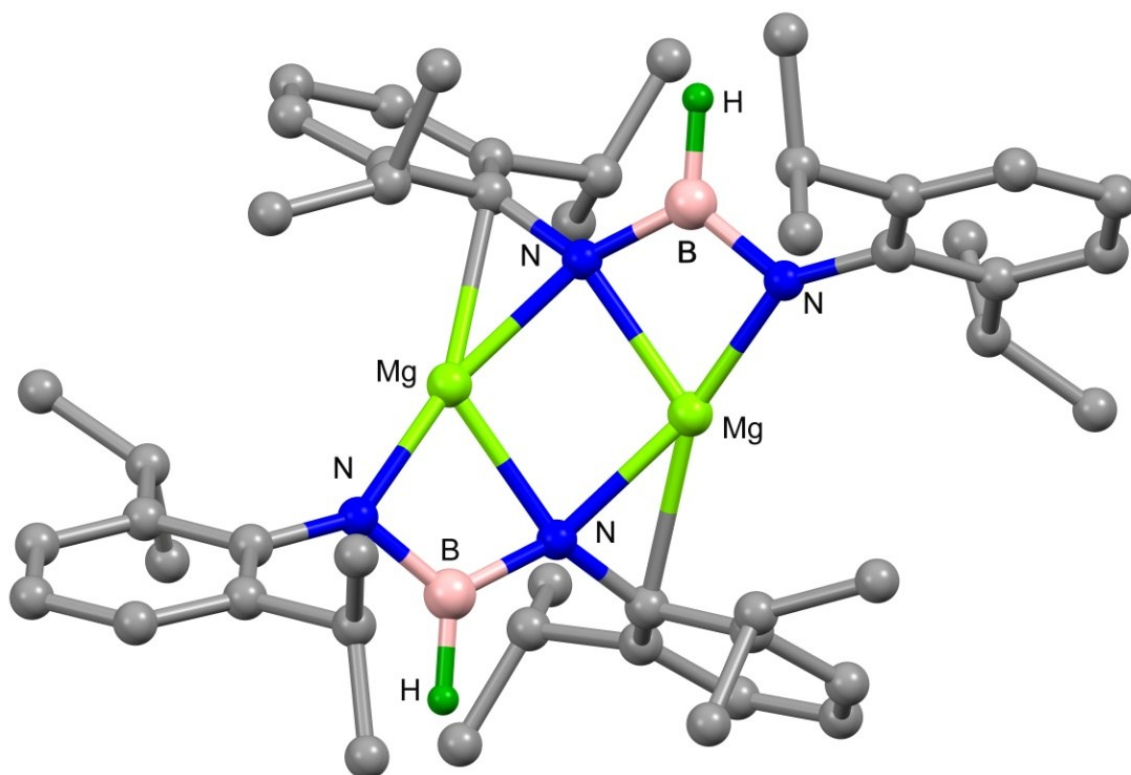

**Figure S24.** Optimized structure of  $(\text{DIPPNBN-Mg})_2$  at the B3PW91/6-311++G\*\* level (C1). The frequency calculation has been done at the B3PW91/6-311G\* level (NIMAG=0). The dimerization energy (corrected for ZPE) is 76.9 kcal/mol.

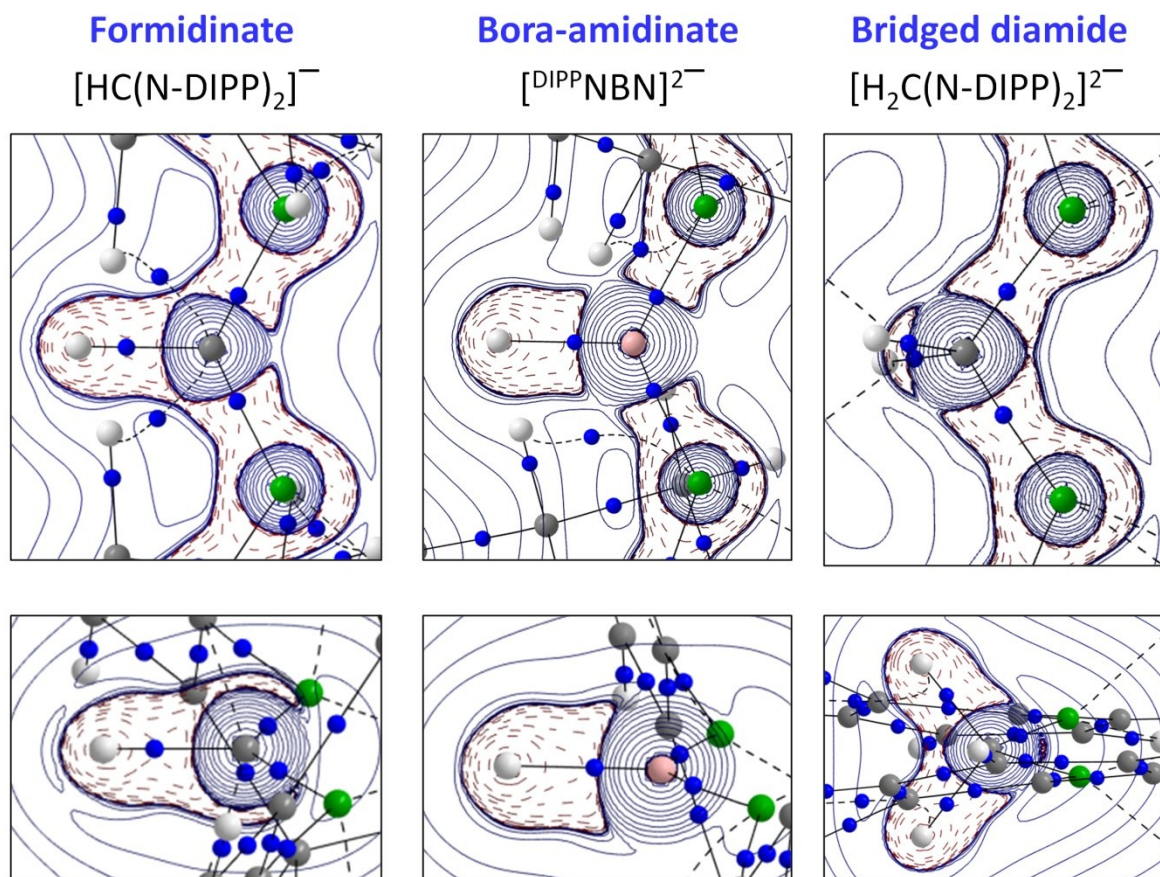

**Figure S25.** AIM analysis of the electron density in formidinate, bora-amidinate and bridged diamide anions. Top: intersection through the N-C-N or N-B-N planes. Bottom: Intersection through central H-C or H-B unit perpendicular to the N-C-N or N-B-N planes.

## 4. References

1. O. V. Dolomanov, L. J. Bourhis, R. J. Gildea, J. A. K. Howard and H. Puschmann, *J. Appl. Cryst.* **2009**, *42*, 339-341.
2. G. M. Sheldrick, *Acta Cryst.* **2015**, *A71*, 3-8.
3. G. M. Sheldrick, *Acta Cryst.* **2008**, *A64*, 112-122.
4. A. L. Spek, *PLATON, A Multipurpose Crystallographic Tool* **2000**, Utrecht University, Utrecht, The Netherlands.
5. M. J. Frisch, G. W. Trucks, H. B. Schlegel, G. E. Scuseria, M. A. Robb, J. R. Cheeseman, G. Scalmani, V. Barone, B. Mennucci, G. A. Petersson, H. Nakatsuji, M. Caricato, X. Li, P. H. Hratchian, A. F. Izmaylof, J. Bloino, G. Zheng, J. L. Sonnenberg, M. Hada, M. Ehara, K. Toyota, R. Fukuda, J. Hasegawa, M. Ishida, T. Makajima, Y. Honda, O. Kitao, H. Nakai, T. Vreven, J. A. Montgomery, J. E. Peralta, F. Ogilaro, M. Bearpark, J. J. Heyd, E. Brothers, K. N. Kudin, V. N. Staroverov, T. Keith, R. Kobayashi, J. Normand, K. Raghavachari, A. Rendell, J. C. Burant, S. S. Iyengar, J. Tomasi, M. Cossi, N. Rega, J. M. Millam, M. Klene, J. E. Knox, J. E. Cross, V. Bakken, C. Adamo, J. Jaramillo, R. Gomperts, R. E. Stratmann, O. Yazyev, A. J. Austin, R. Cammi, C. Pomelli, J. W. Ochterski, R. L. Martin, K. Morokuma, V. G. Zakrzewski, G. A. Voth, P. Salvador, J. J. Dannenberg, S. Dapprich, A. D. Daniels, O. Farkas, J. B. Foresman, J. V. Ortiz, J. Cioslowski, D. J. Fox, *Gaussian 09 Rev. D.* **2013**, Wallingford, Connecticut, USA.
6. A. D. Becke, *J. Chem. Phys.* **1993**, *98*, 1372-1377.
7. J. P. Perdew, *Electronic Structure of Solids*, Akademie Verlag, Berlin, **1991**.
8. K. B. Wiberg, *J. Comput. Chem.* **1986**, *7*, 379-379.
9. T. Clark, J. Chandrasekhar, G. W. Spitznagel, P. v. R. Schleyer, *J. Comp. Chem.* **1983**, *4*, 294-301.
10. R. C. Binning, L. A. Curtiss, *J. Comput. Chem.* **1990**, *11*, 1206-1216.
11. A. E. Reed, R. B. Weinstock, F. Weinhold, *J. Chem. Phys.* **1985**, *83*, 735-746.
12. N. van Eikema Hommes, *Molecule V2.3* **2016**, University Erlangen-Nürnberg, Erlangen, Germany.
13. R. F. W. Bader, *Chem. Rev.* **1991**, *91*, 893-928.
14. T. A. Keith, *AIMAll V16* **2016**, TK Gristmill Software, Overland Park KS, USA.
